# Supplementary material
Source: MDPI journal article supplement (https://www.mdpi.com/1424-2818/12/3/114)
Supplement: s1 [file s1]

WT

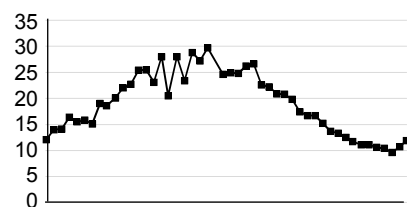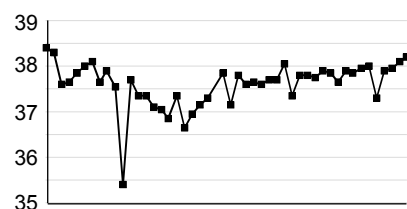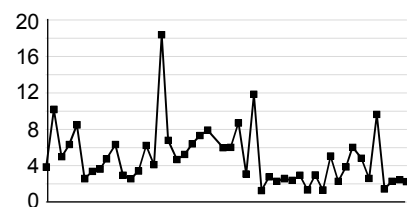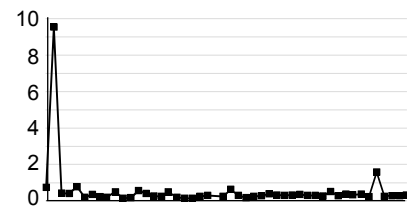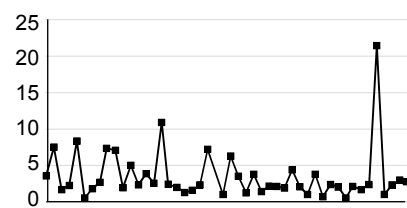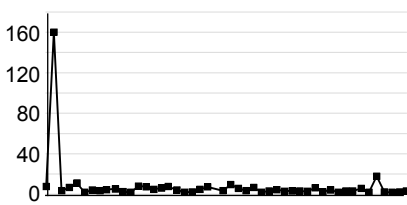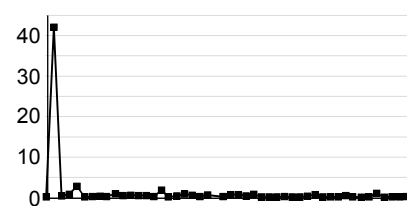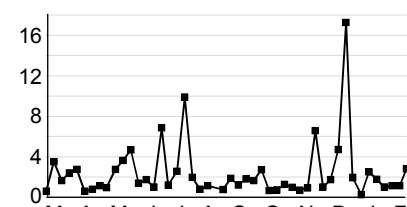

2017 | 2018

AR

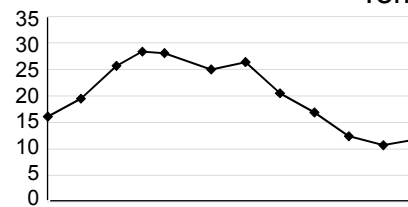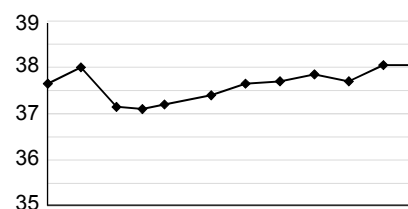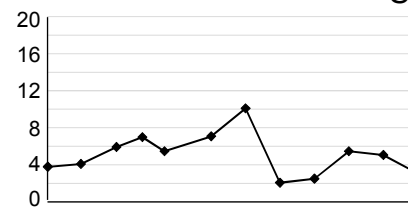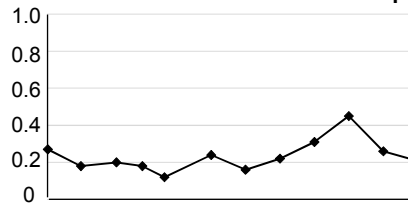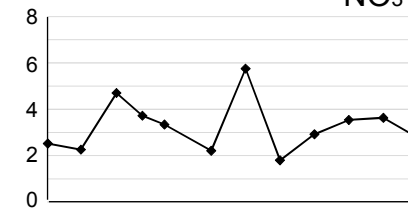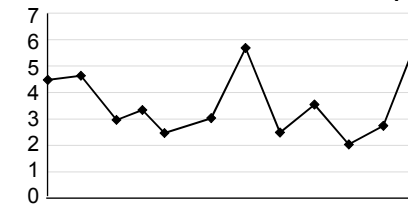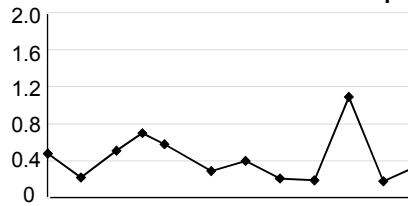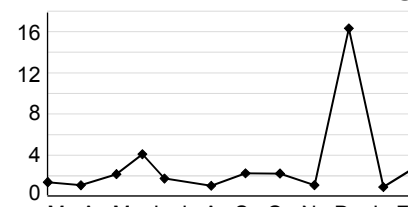

2017 | 2018

MH

Temperature (°C)

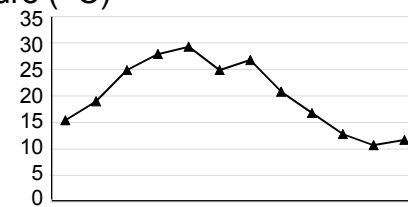

Salinity

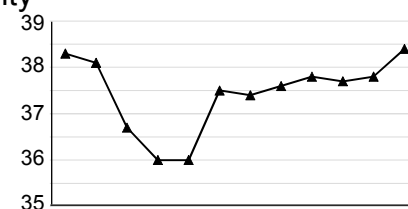SiO<sub>4</sub> (μmol L<sup>-1</sup>)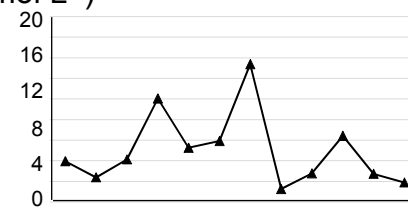PO<sub>4</sub> (μmol L<sup>-1</sup>)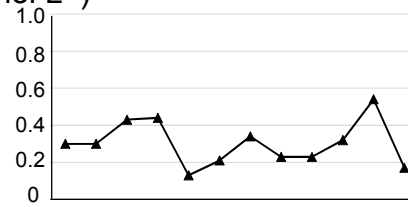NO<sub>3</sub> + NO<sub>2</sub> (μmol L<sup>-1</sup>)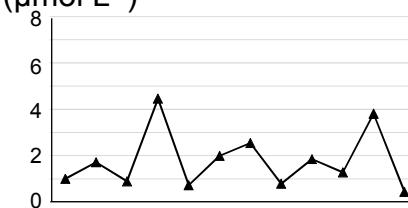NH<sub>4</sub> (μmol L<sup>-1</sup>)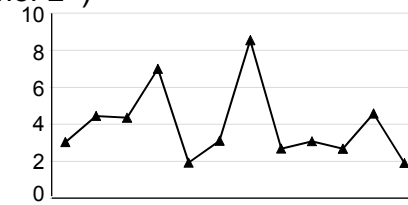POP (μmol L<sup>-1</sup>)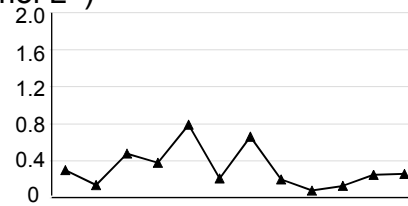Chl a (μg L<sup>-1</sup>)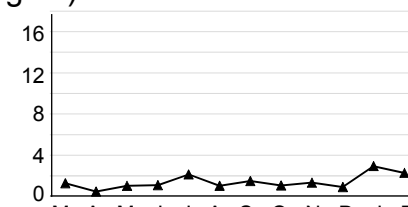

2017 | 2018

HB

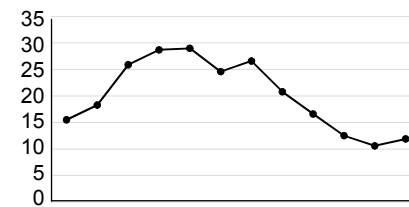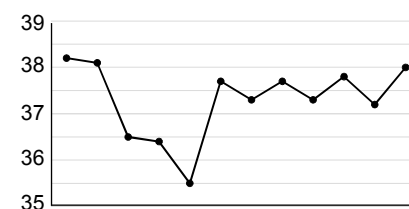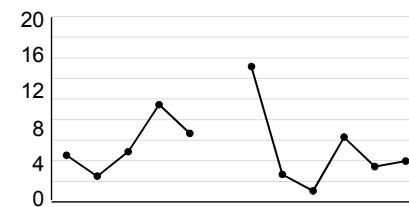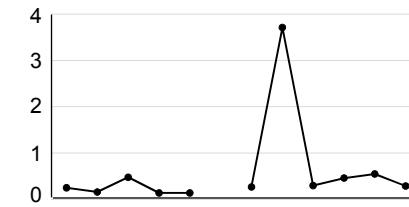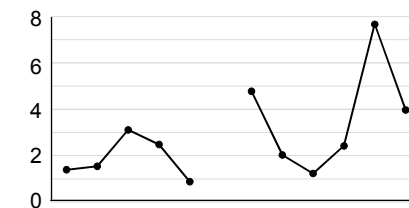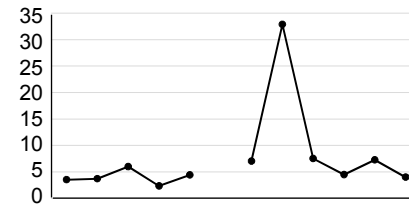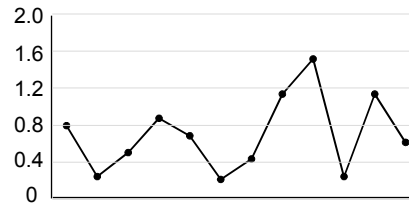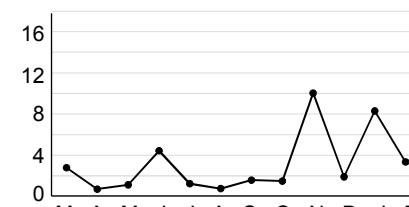

2017 | 2018

Samples
