# Supplementary material
Source: MDPI journal article supplement (https://www.mdpi.com/1424-2818/12/3/114)

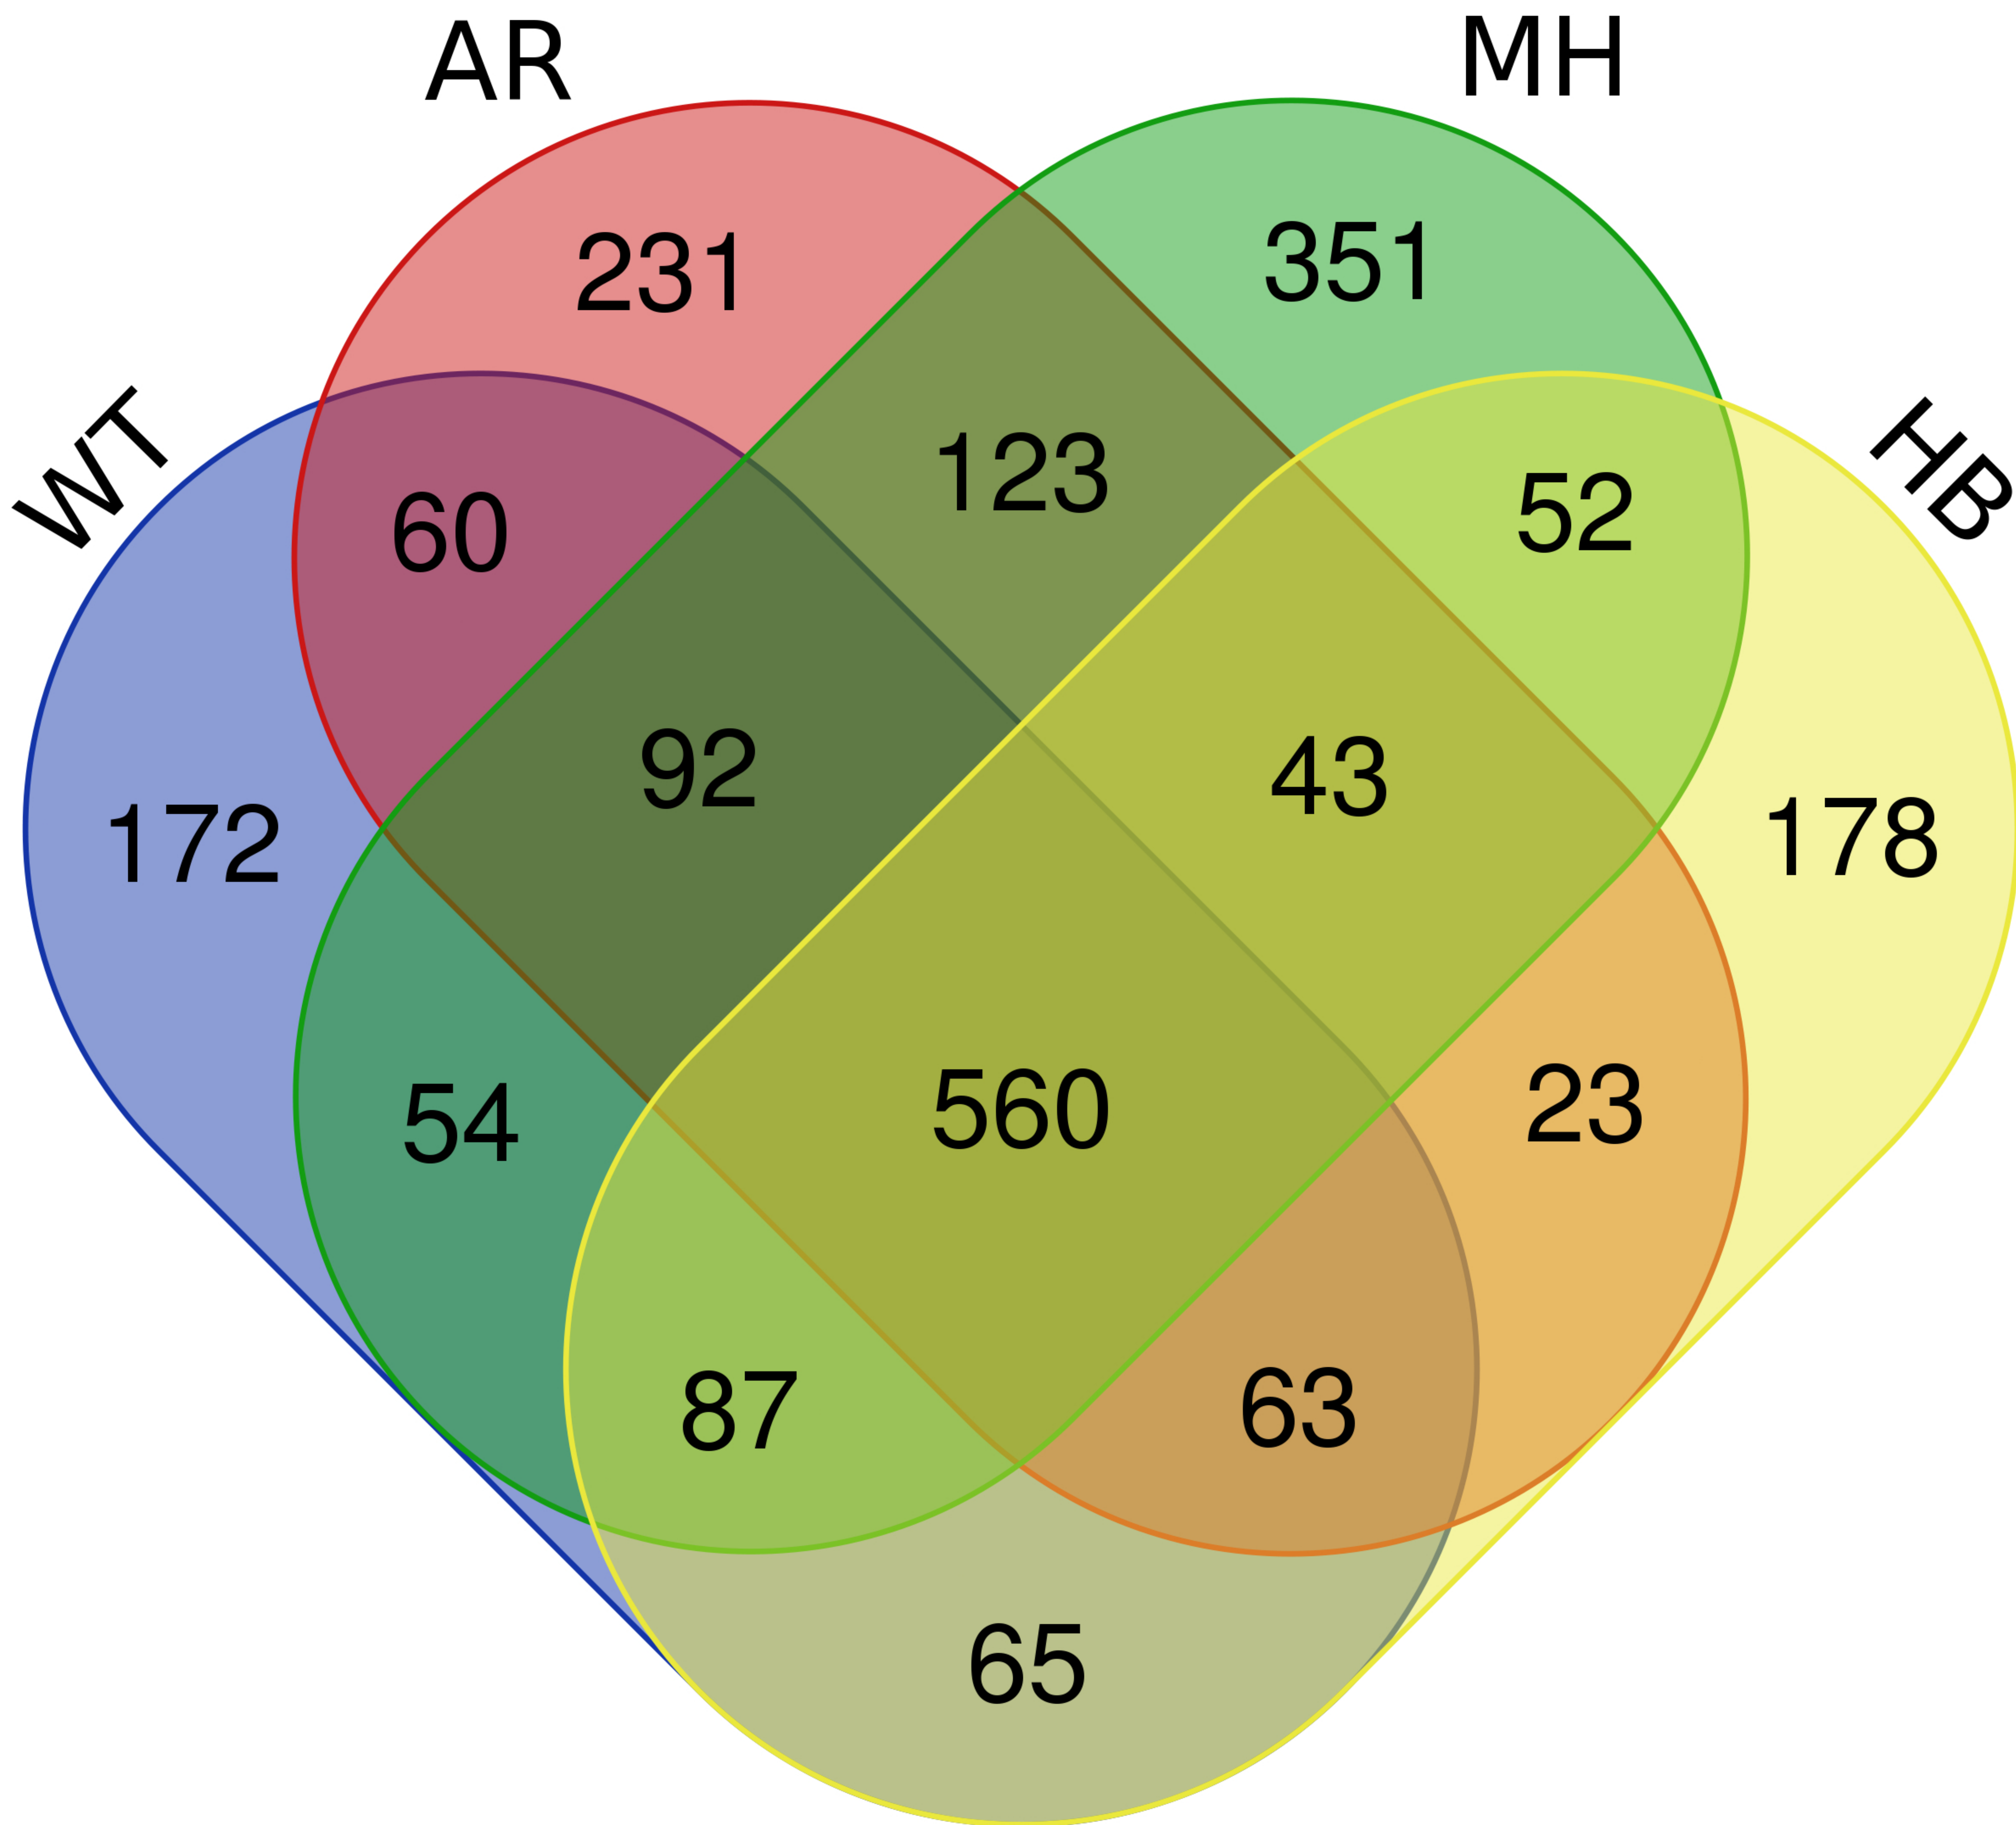

Supplement: s1 [file s1]

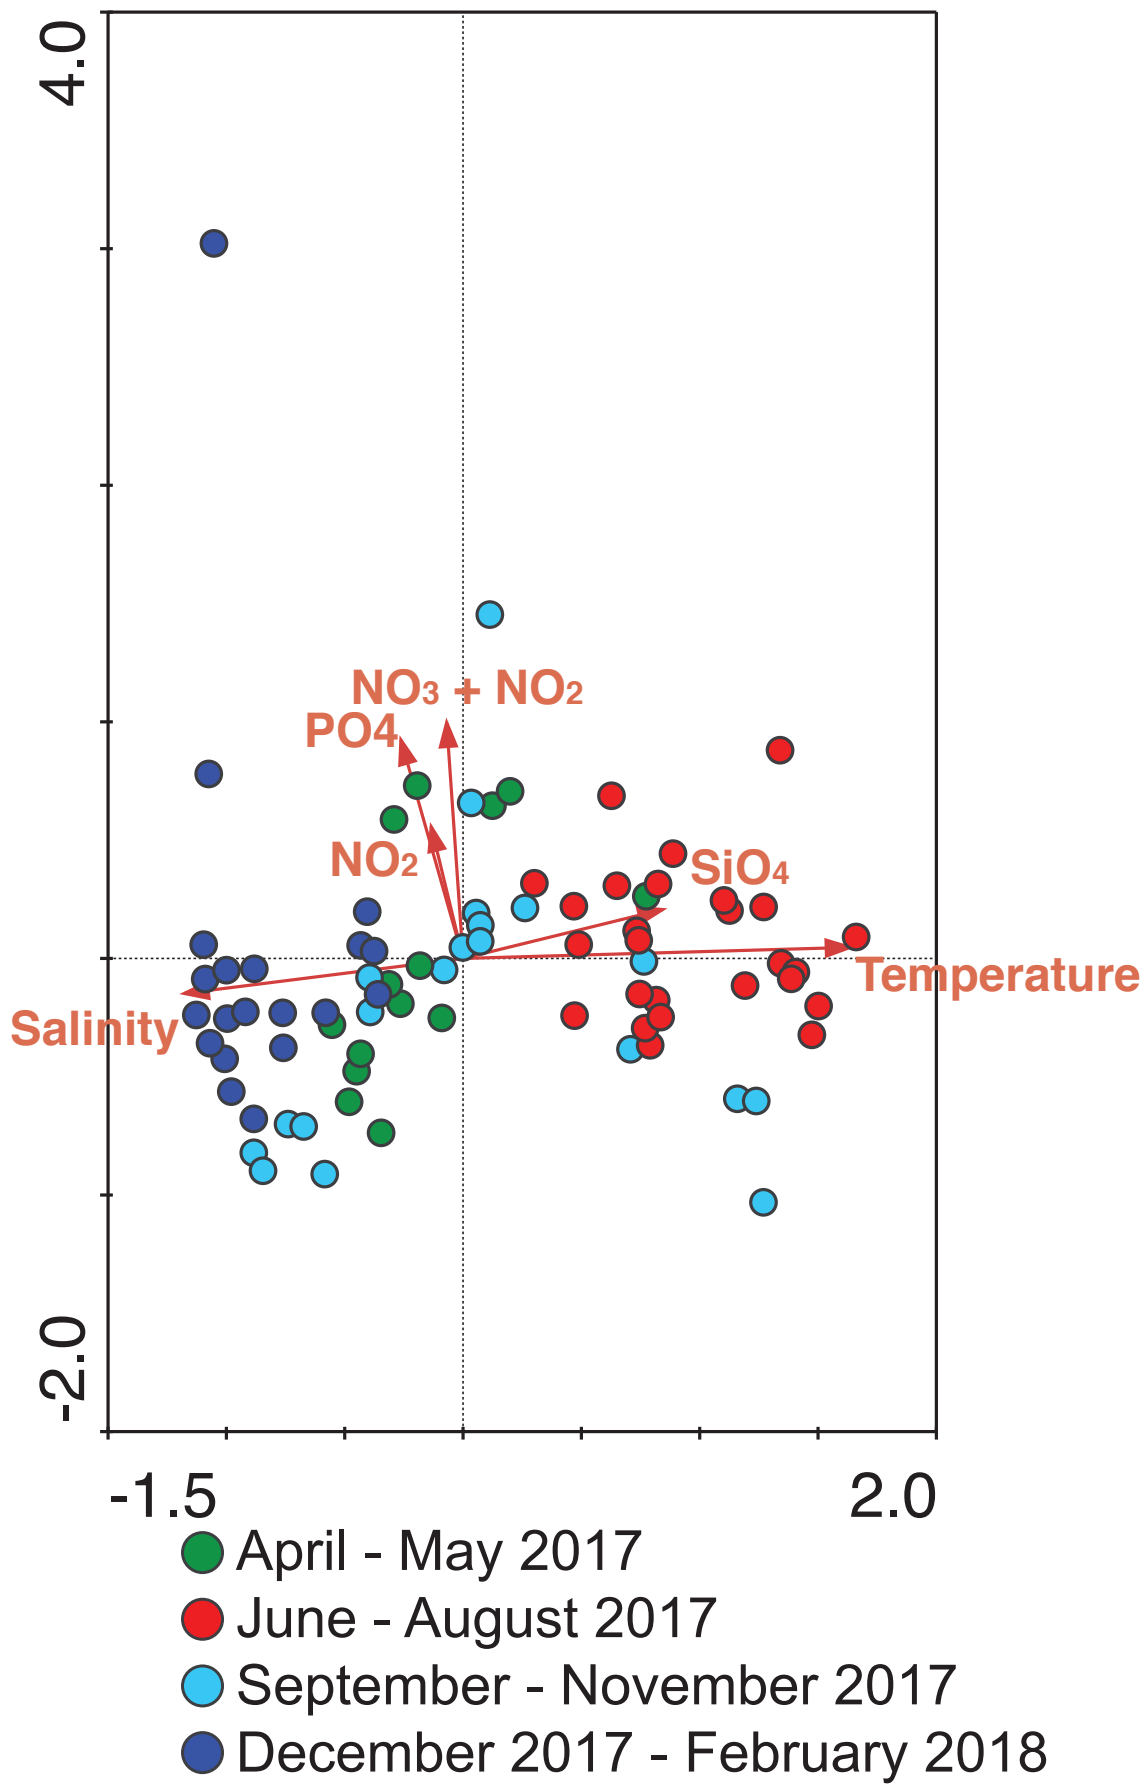

Supplement: s1 [file s1]

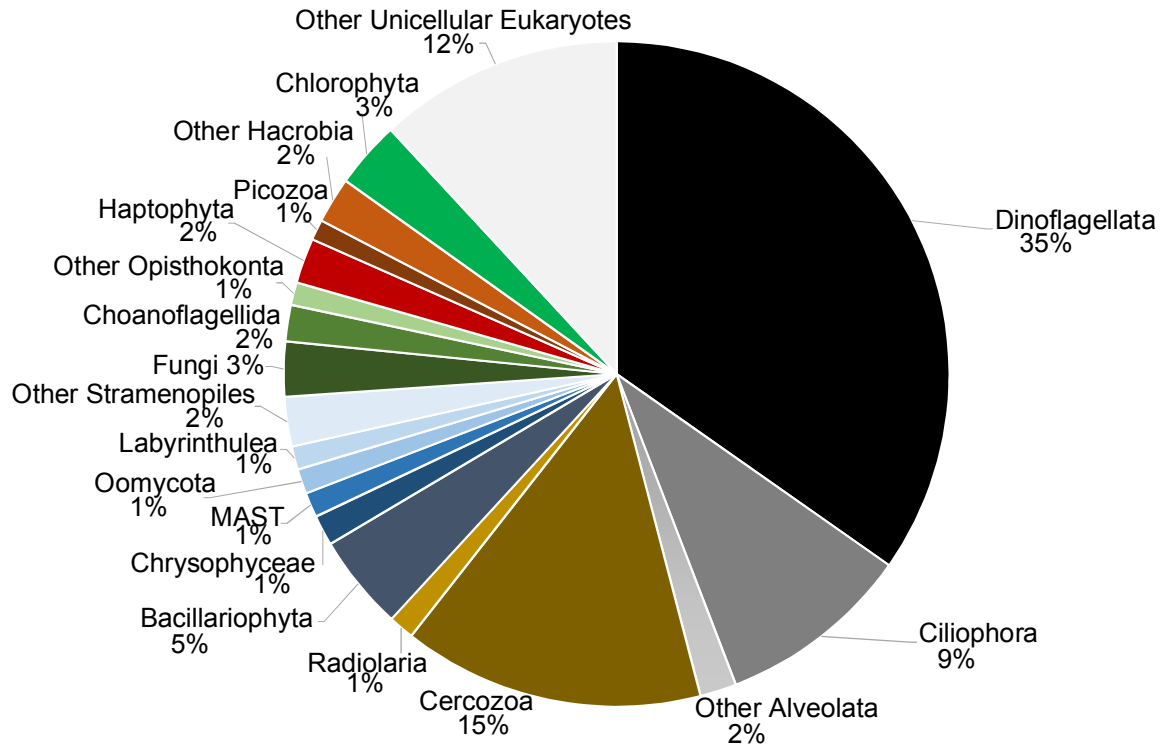

Supplement: s1 [file s1]

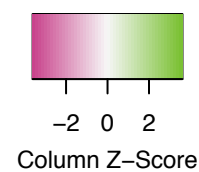

WT

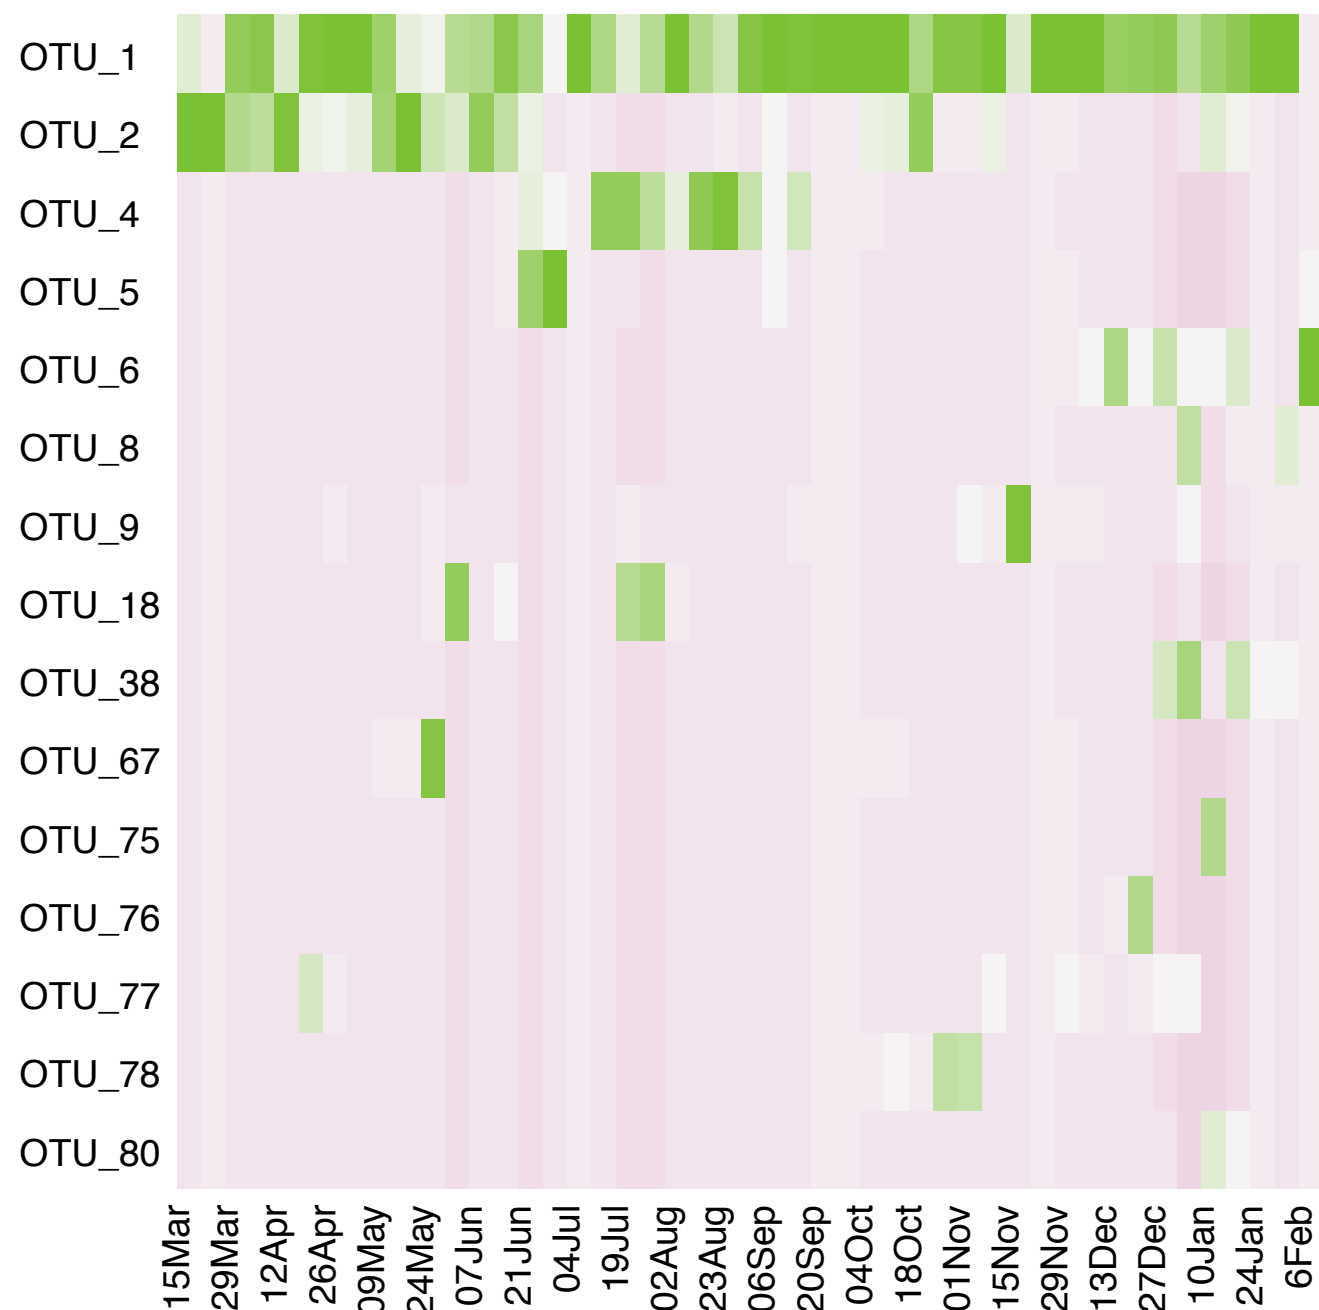

AR

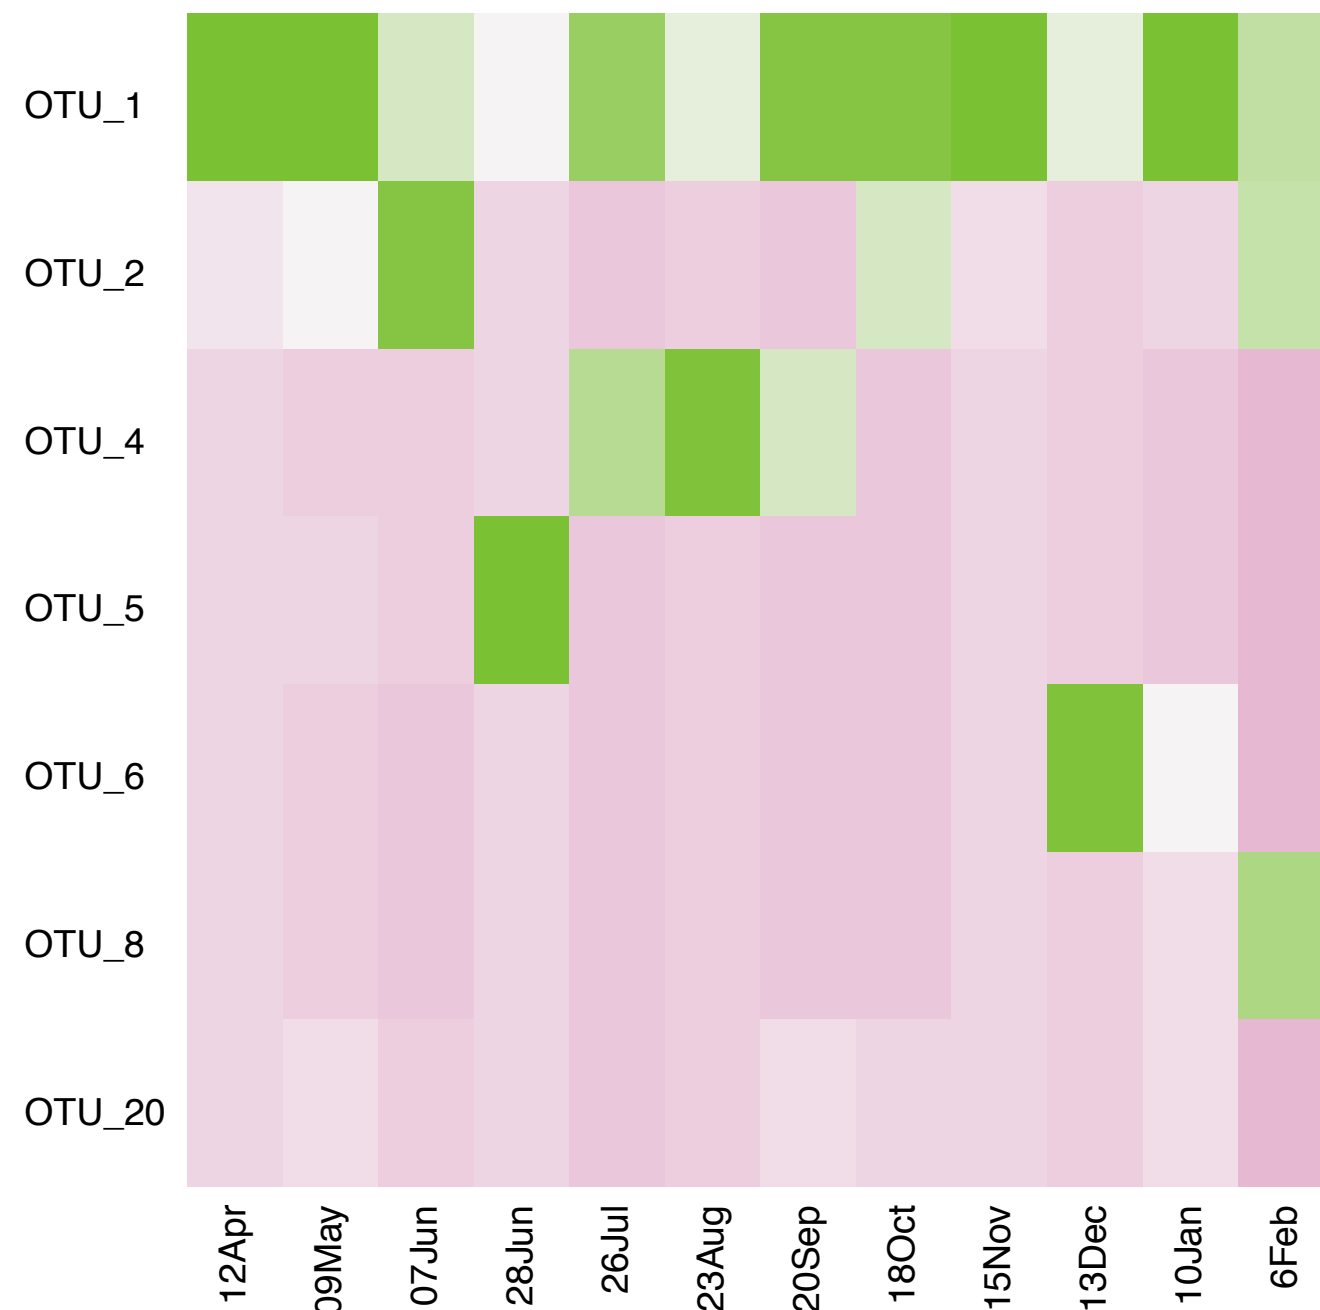

MH

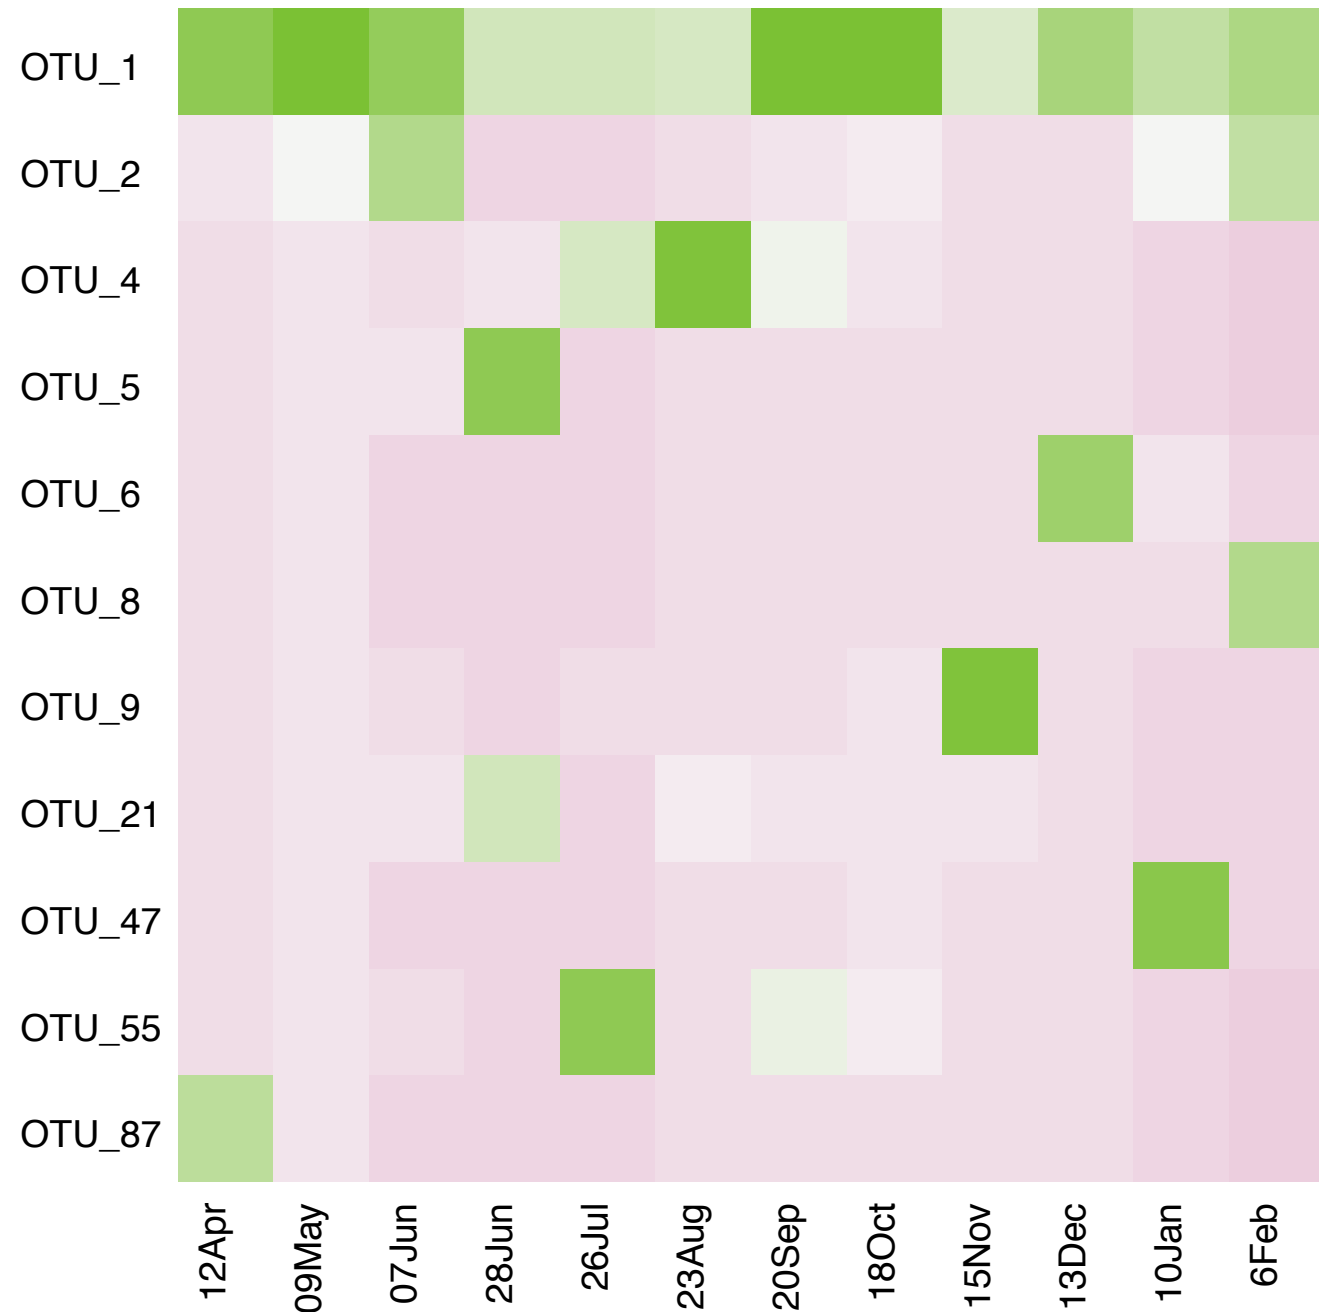

HB

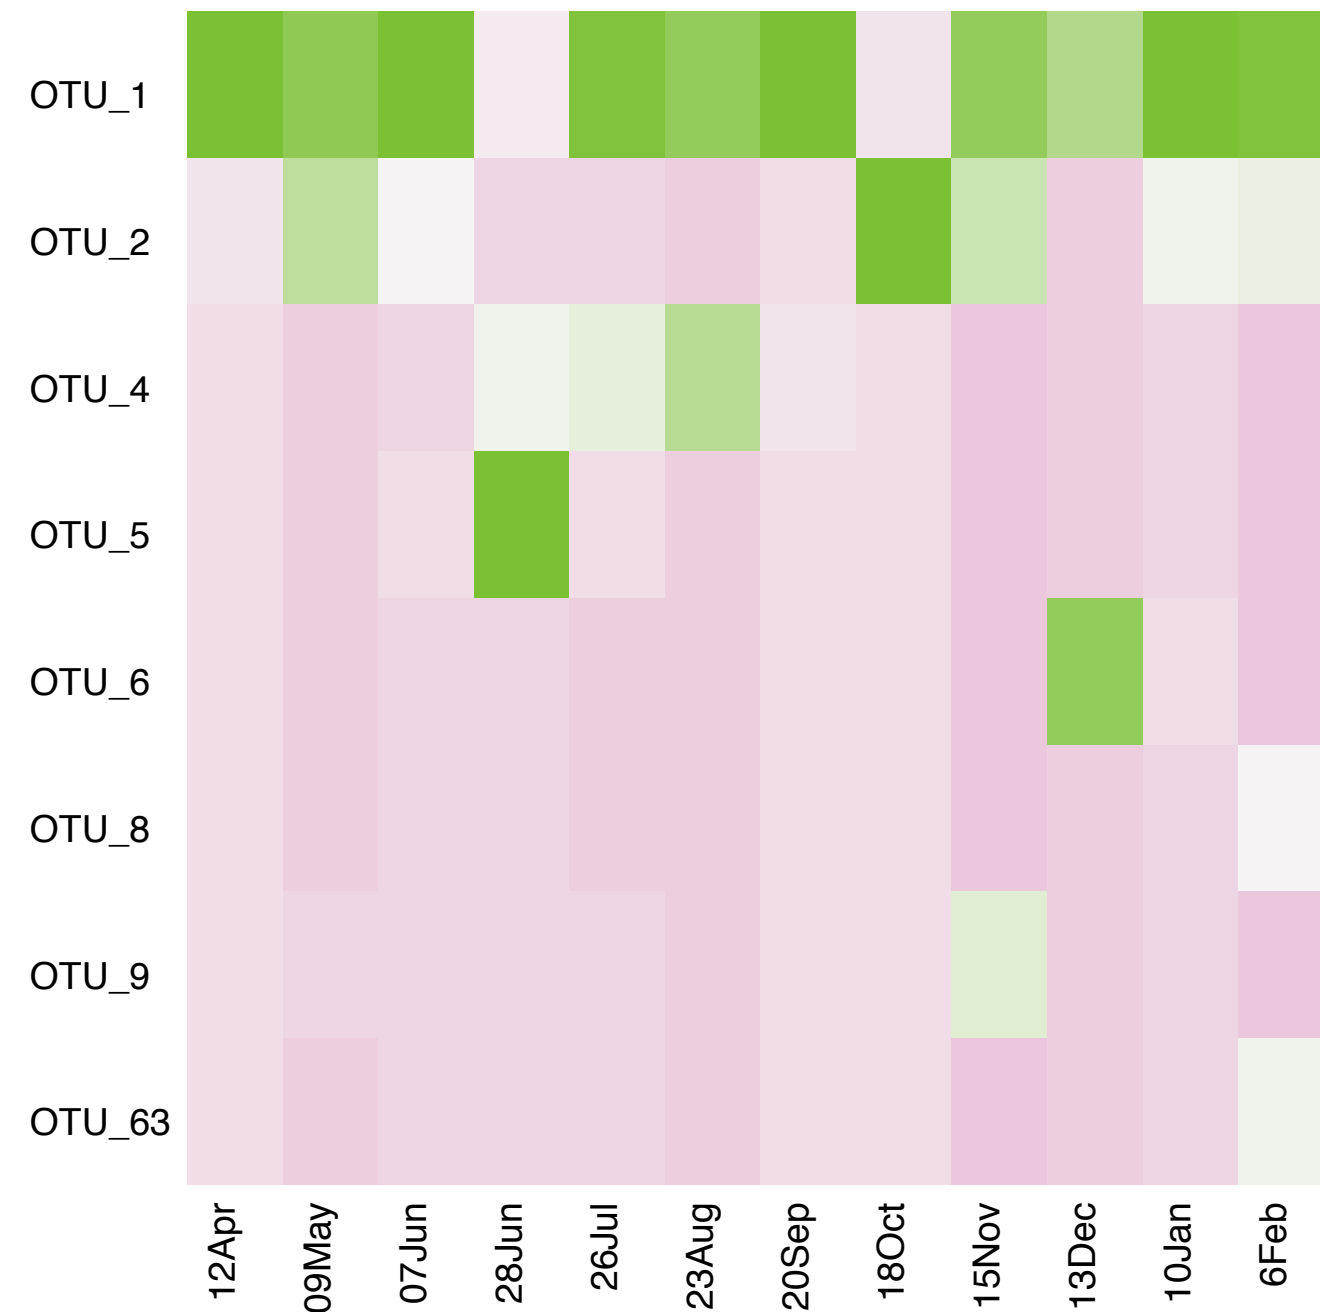

Supplement: s1 [file s1]

Number of OTUs

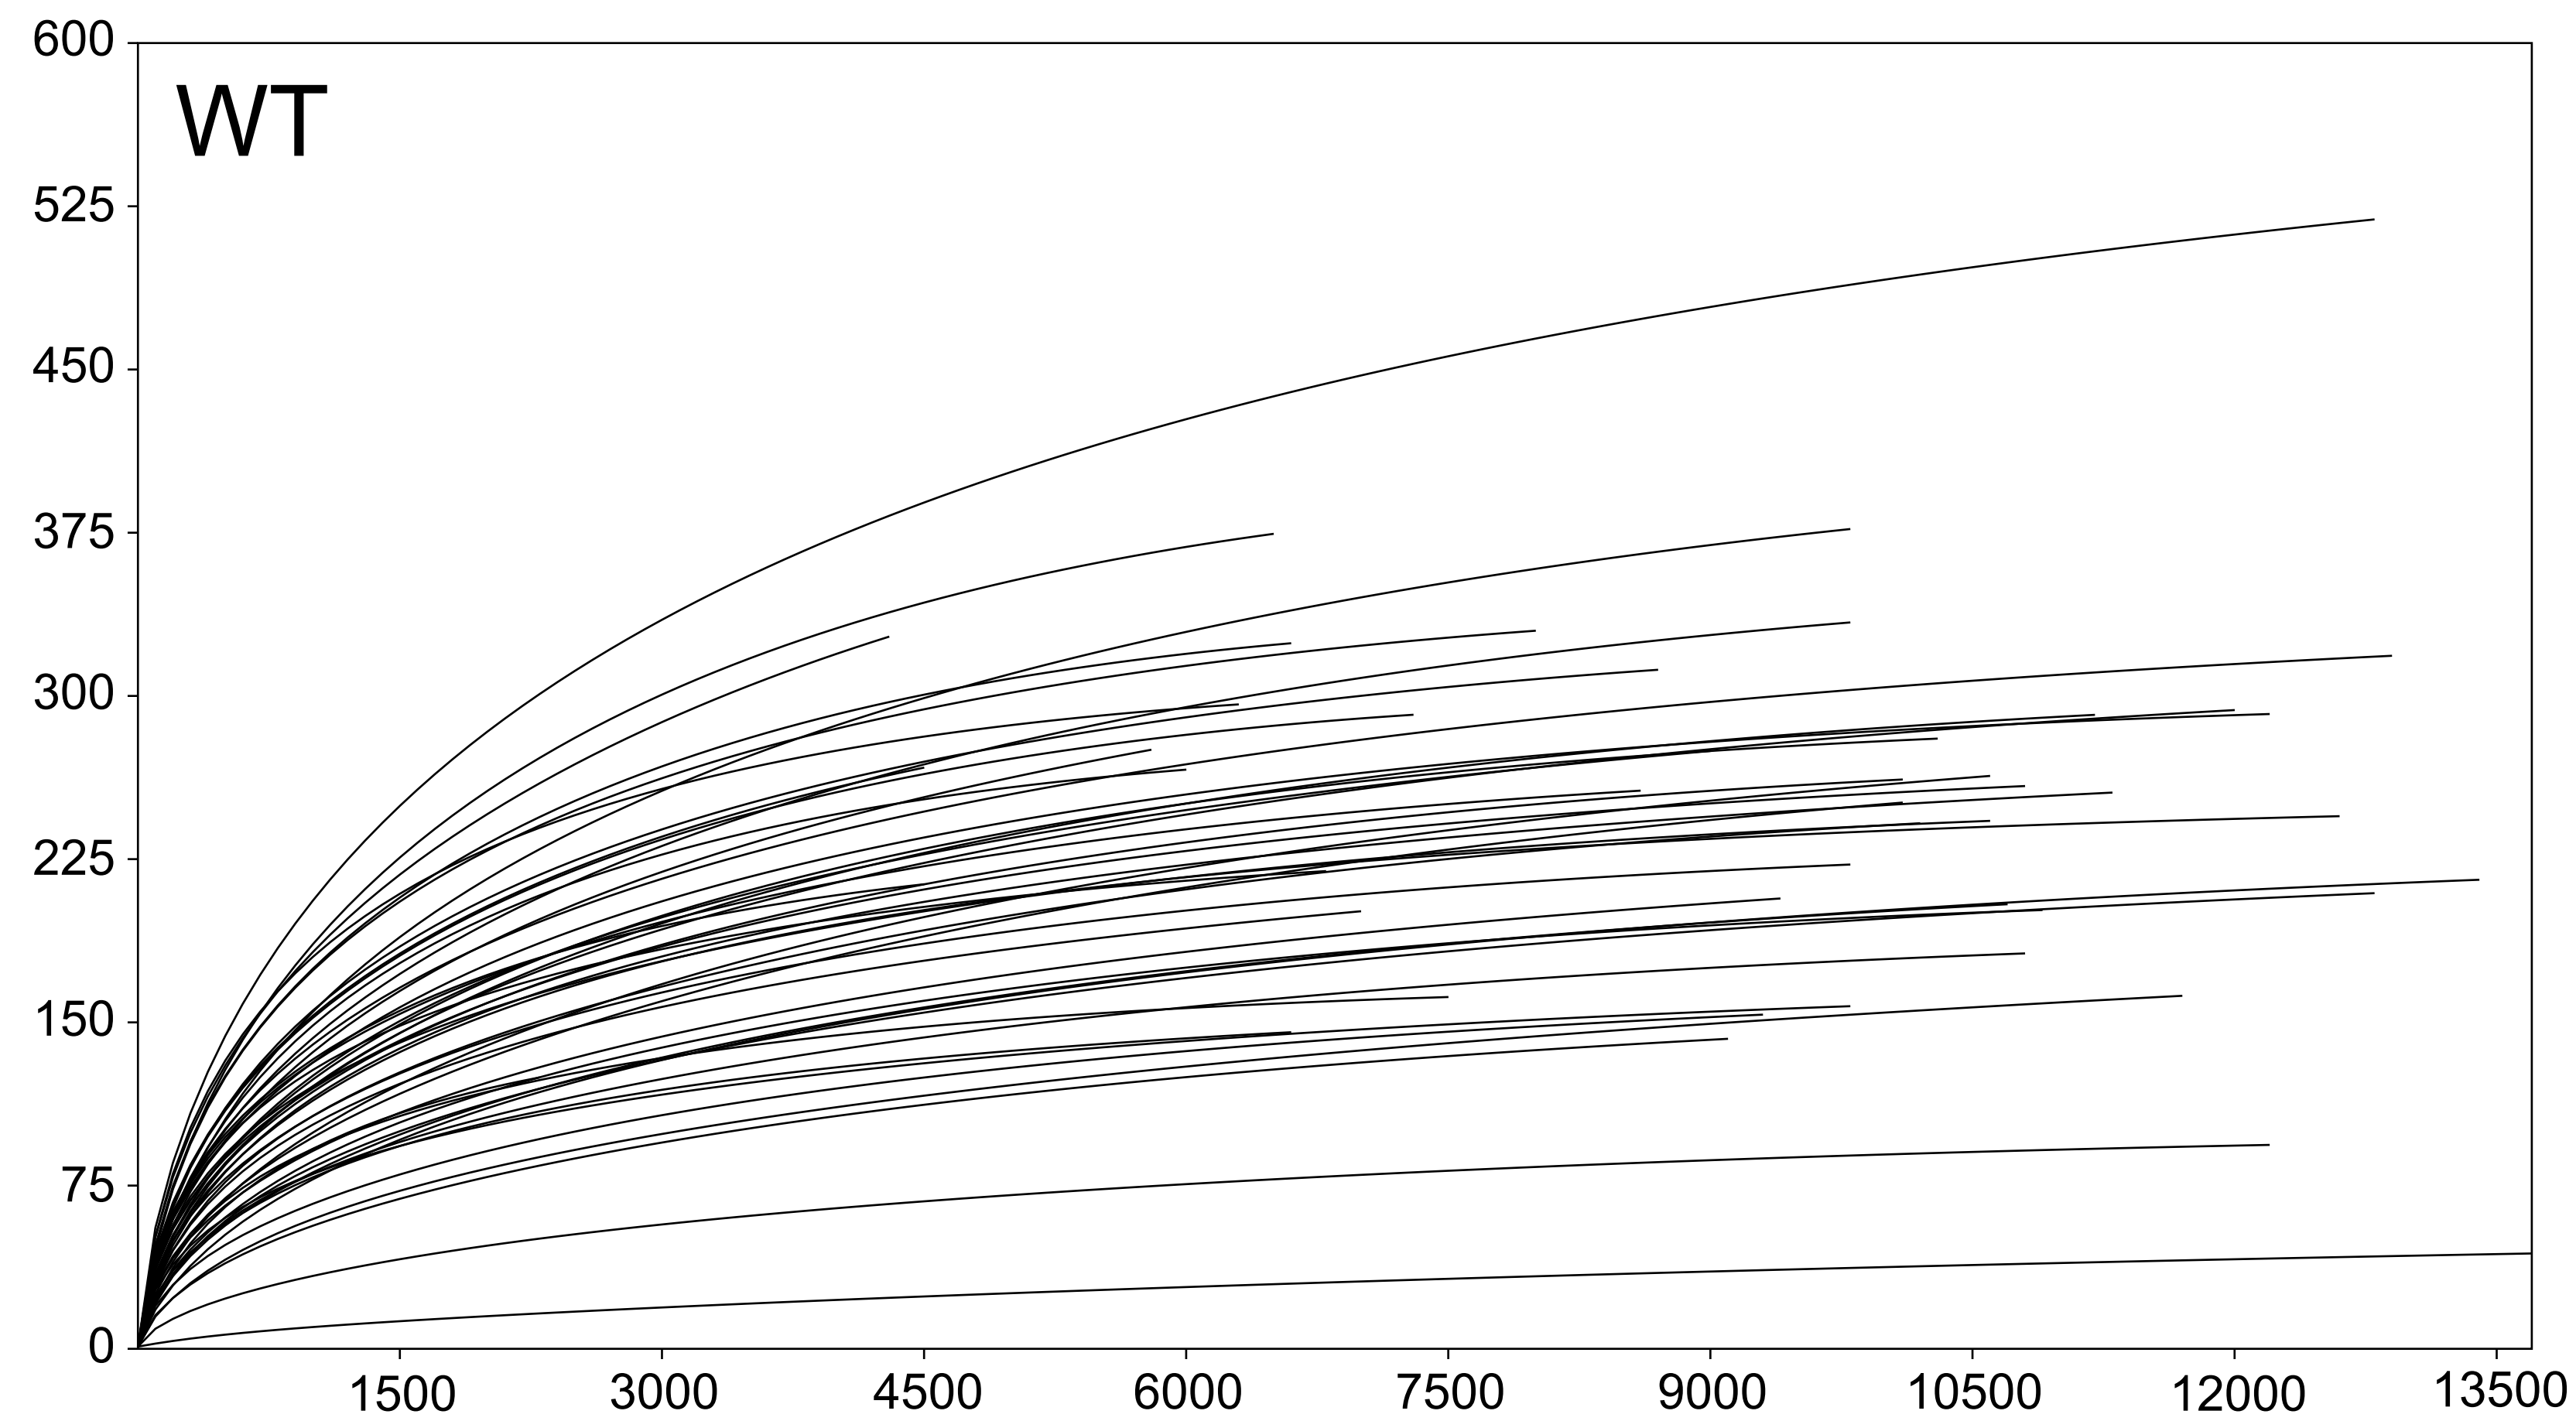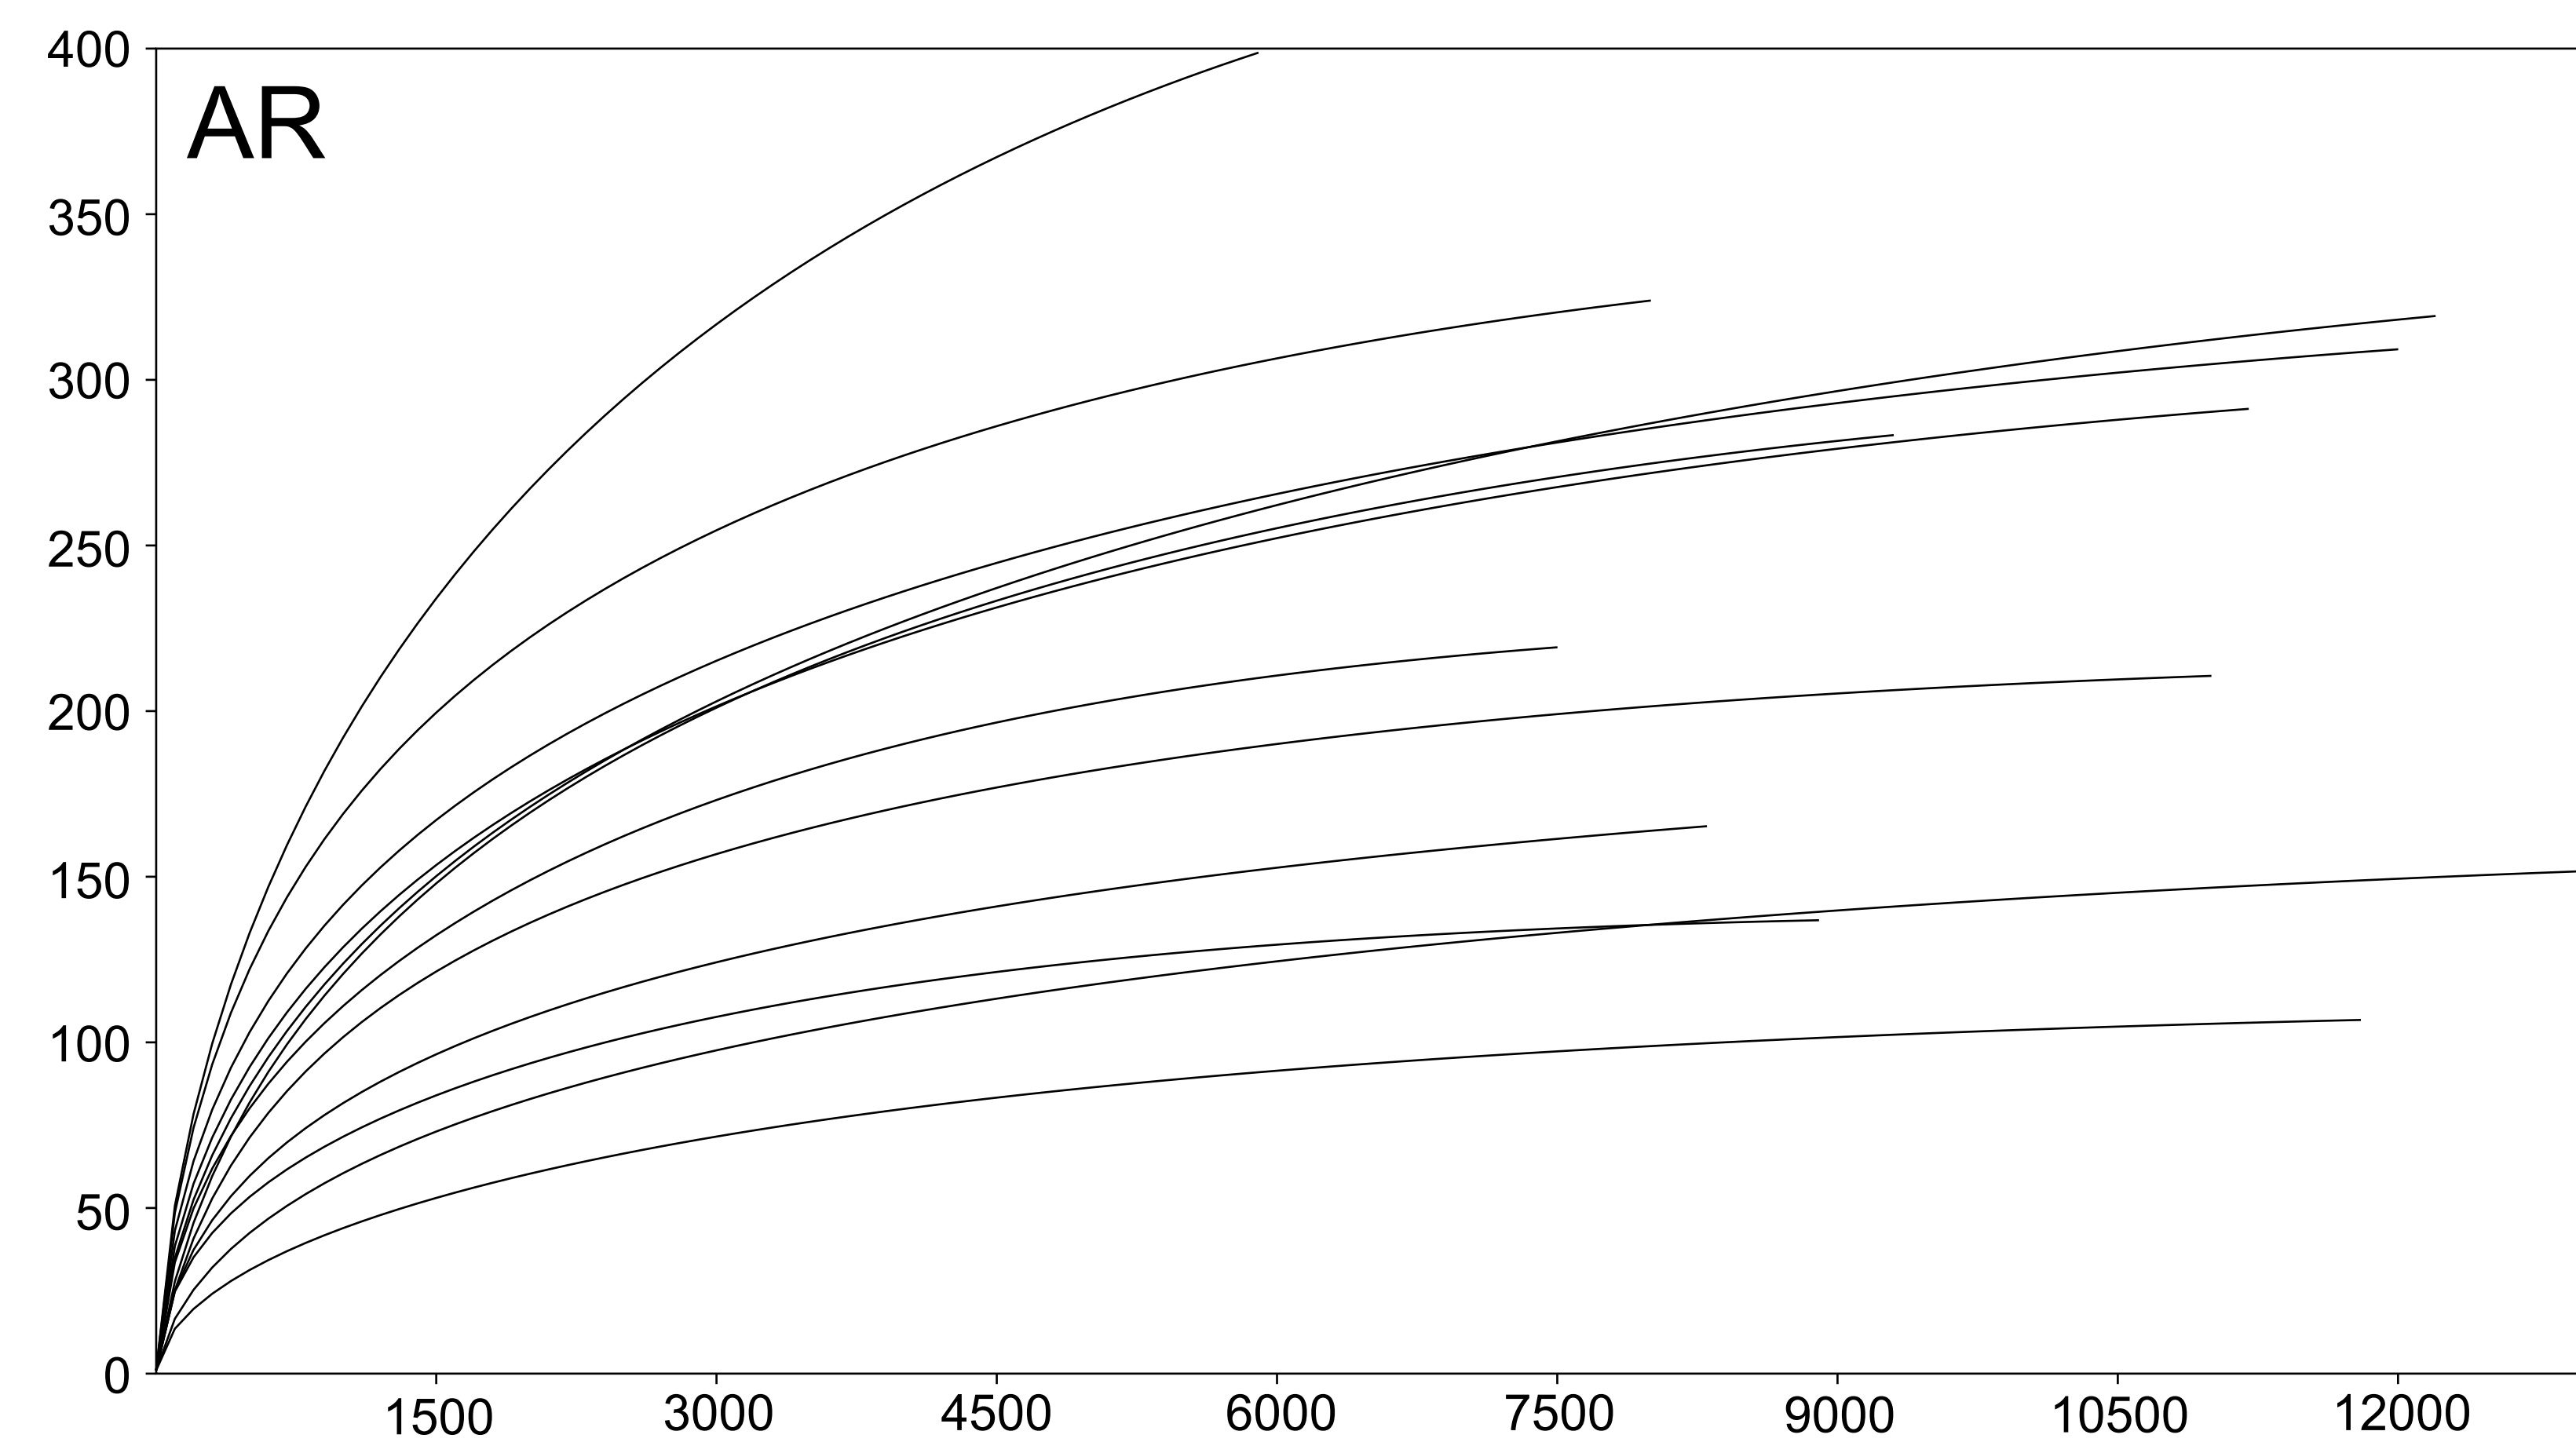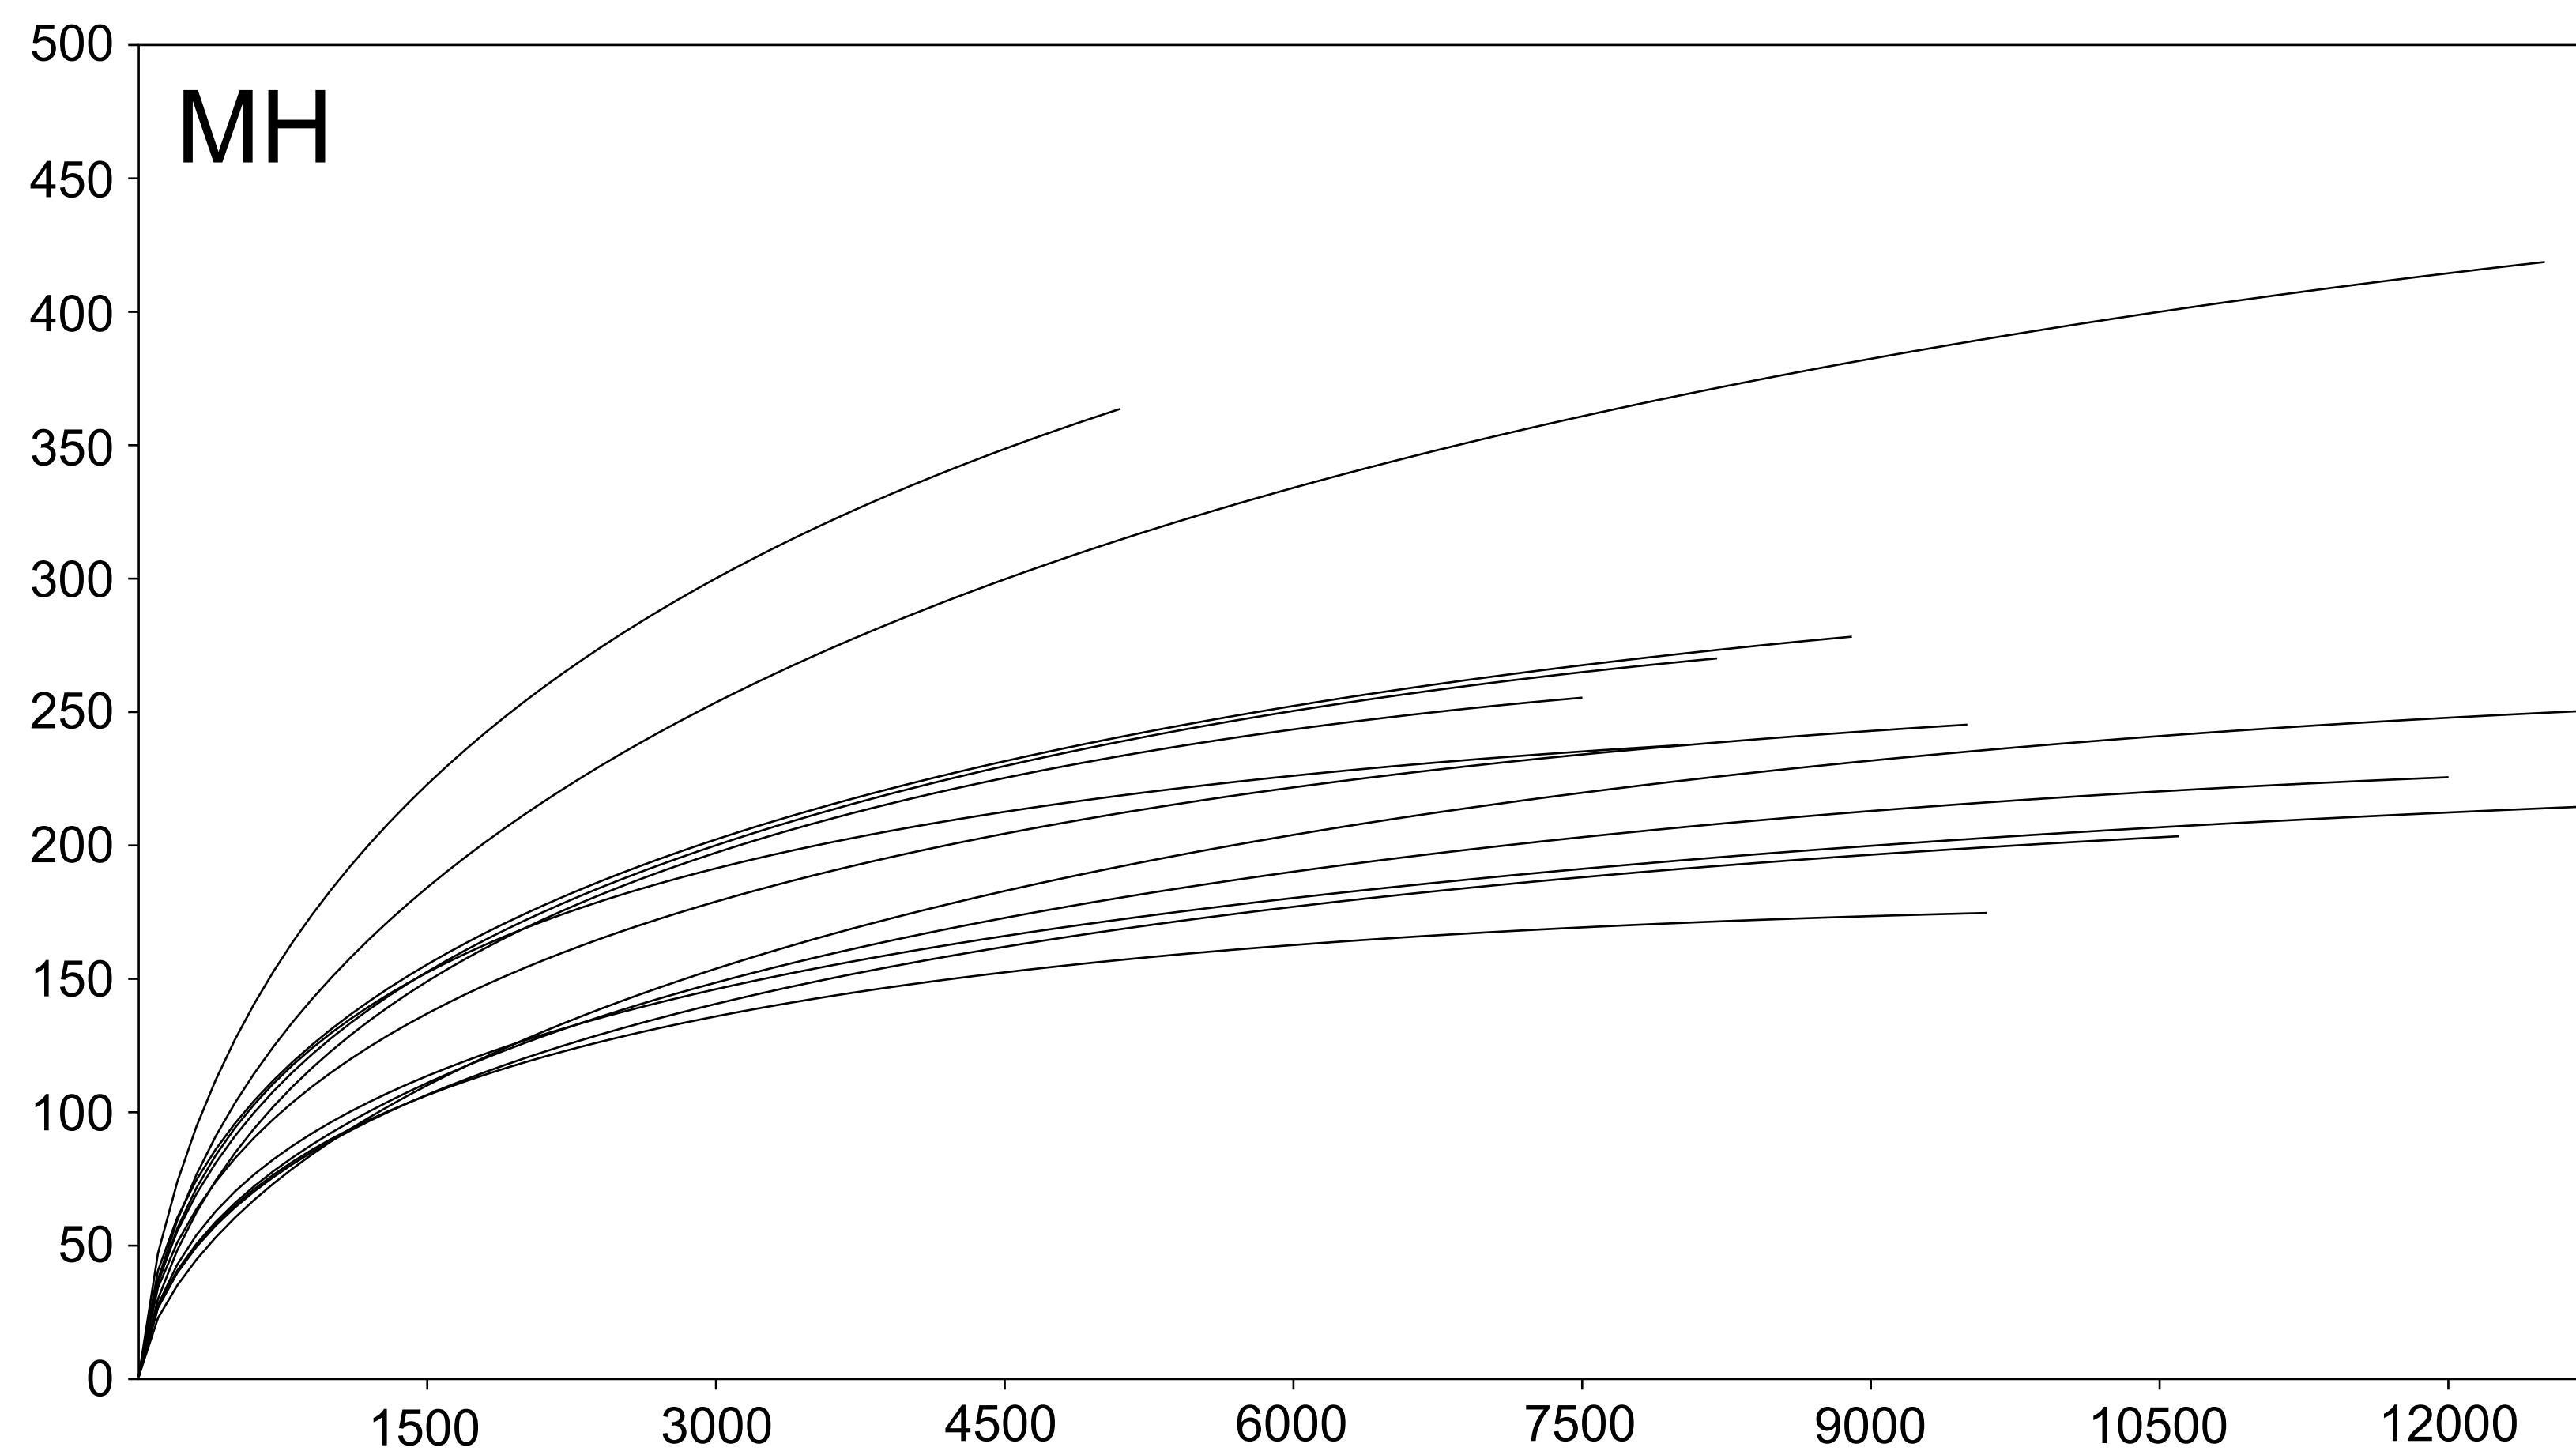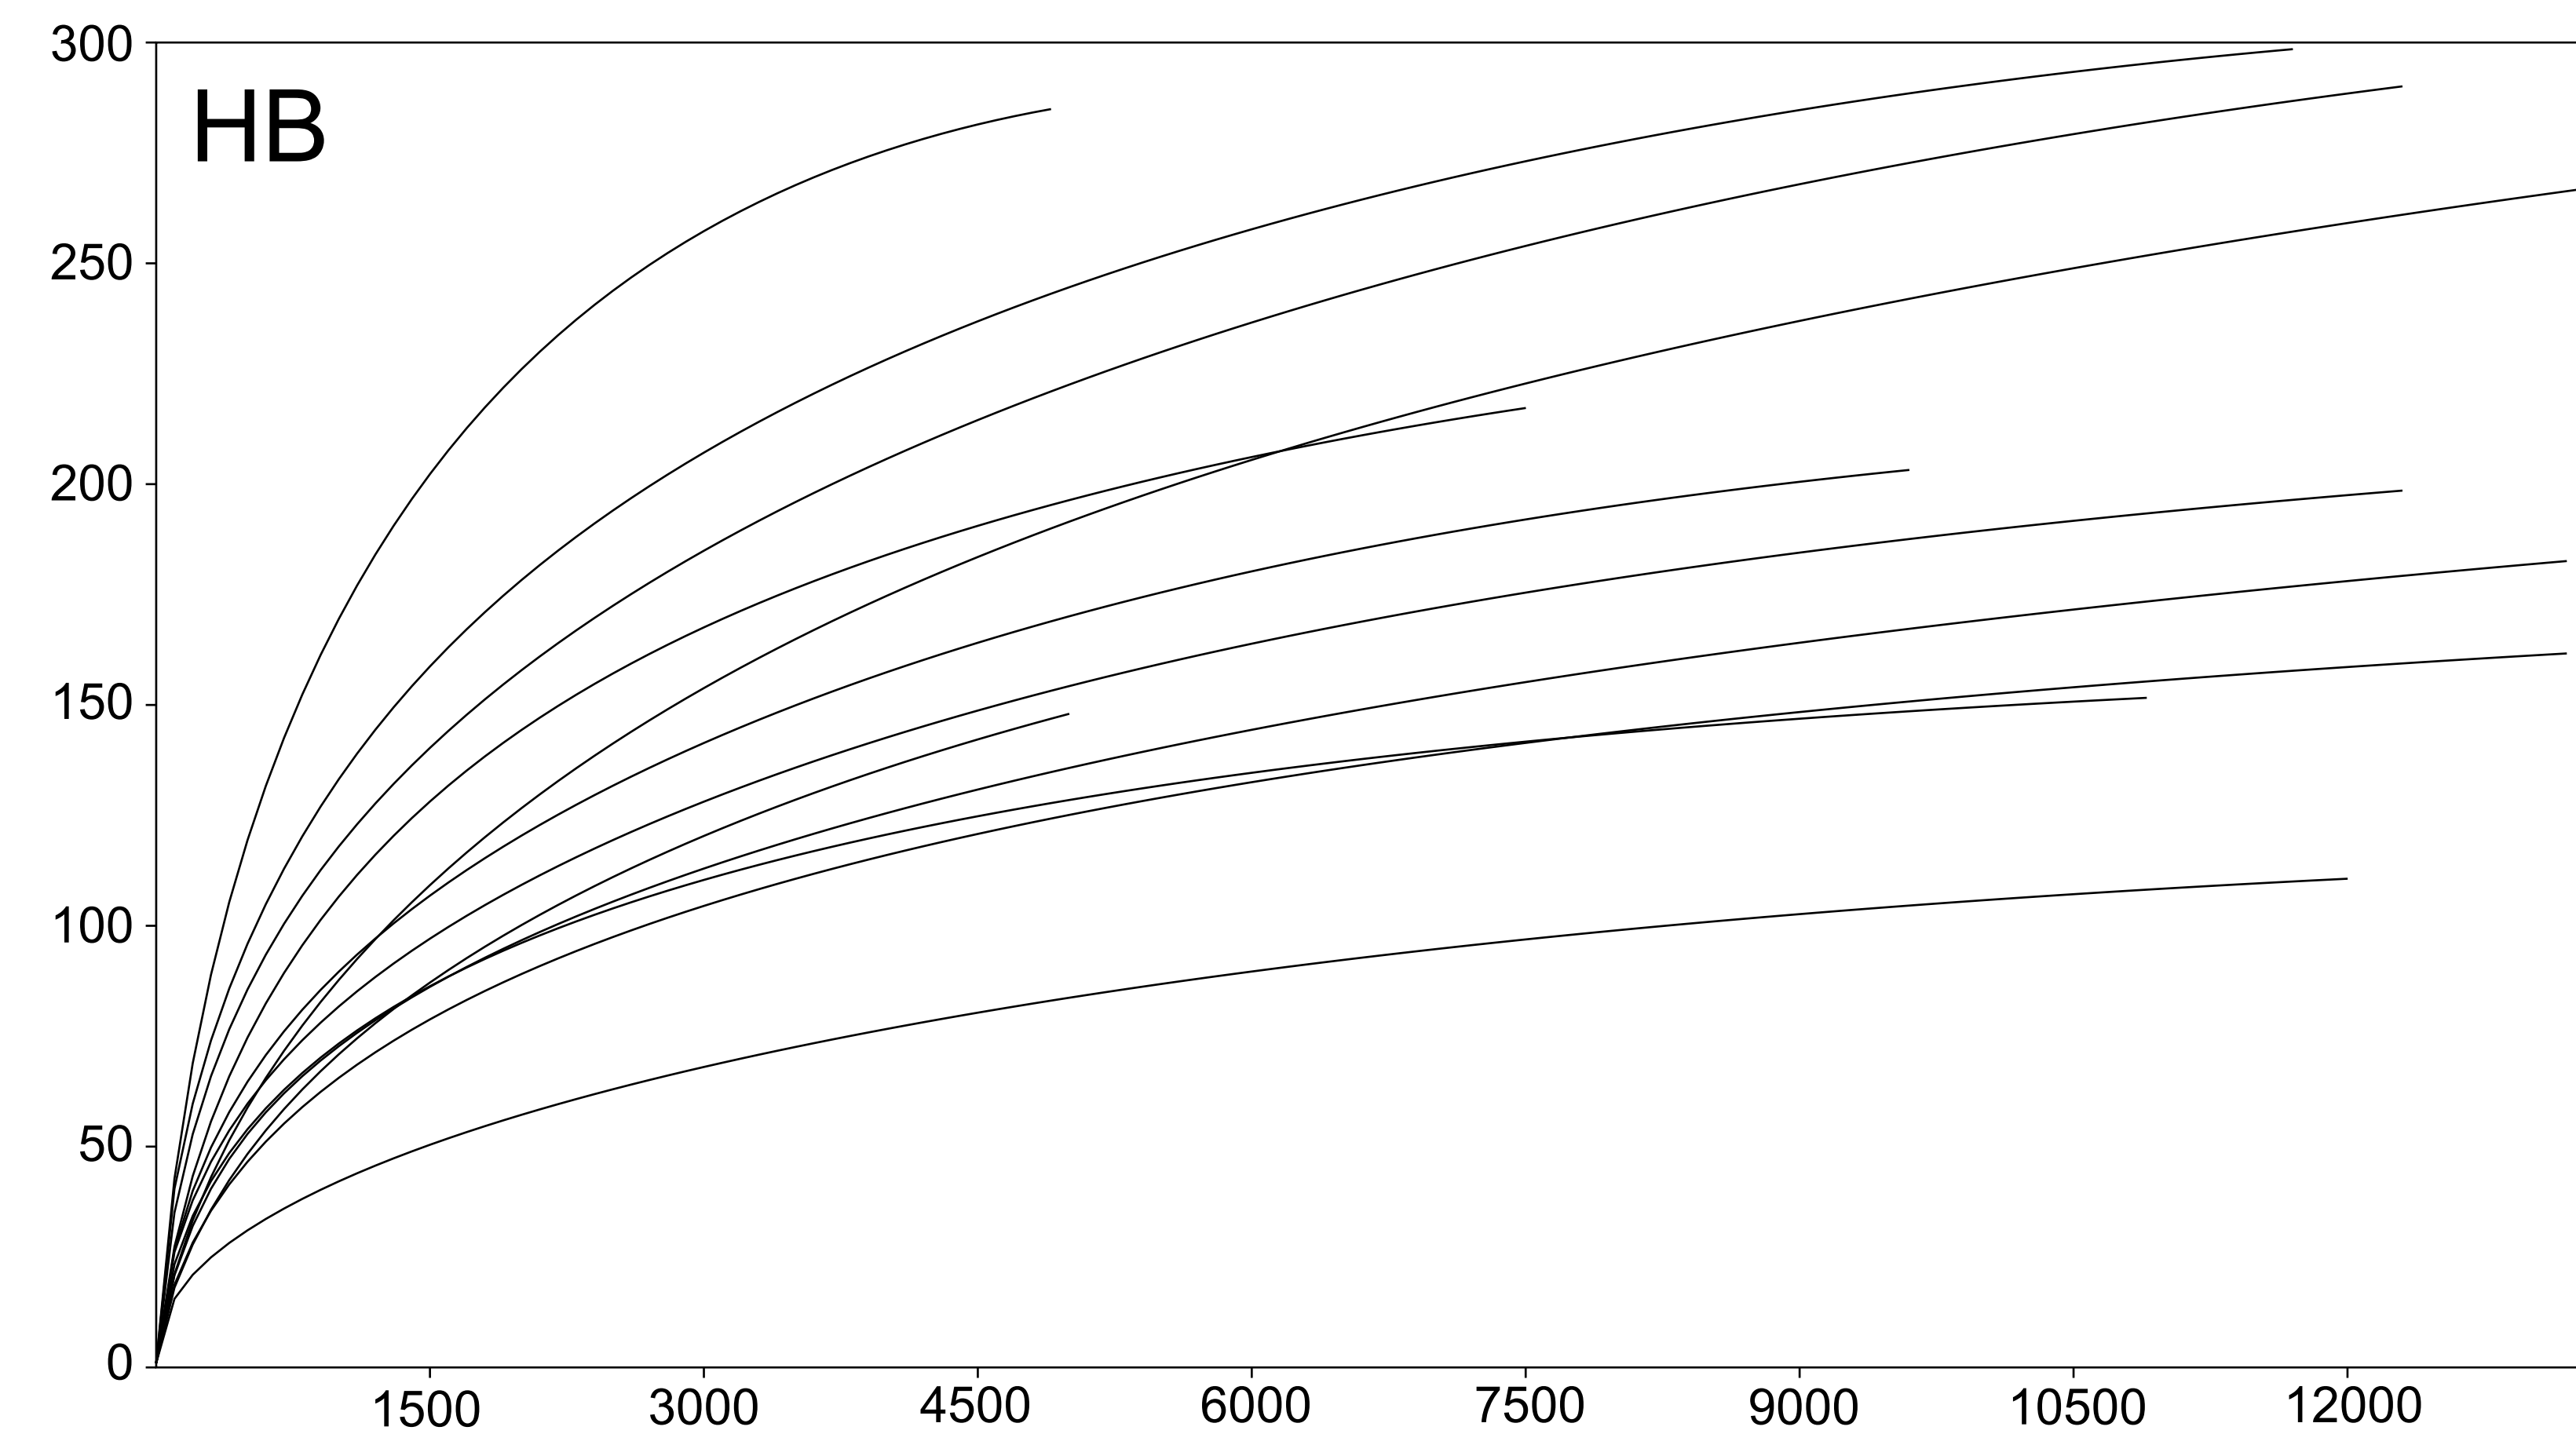

Number of Reads

Supplement: s1 [file s1]

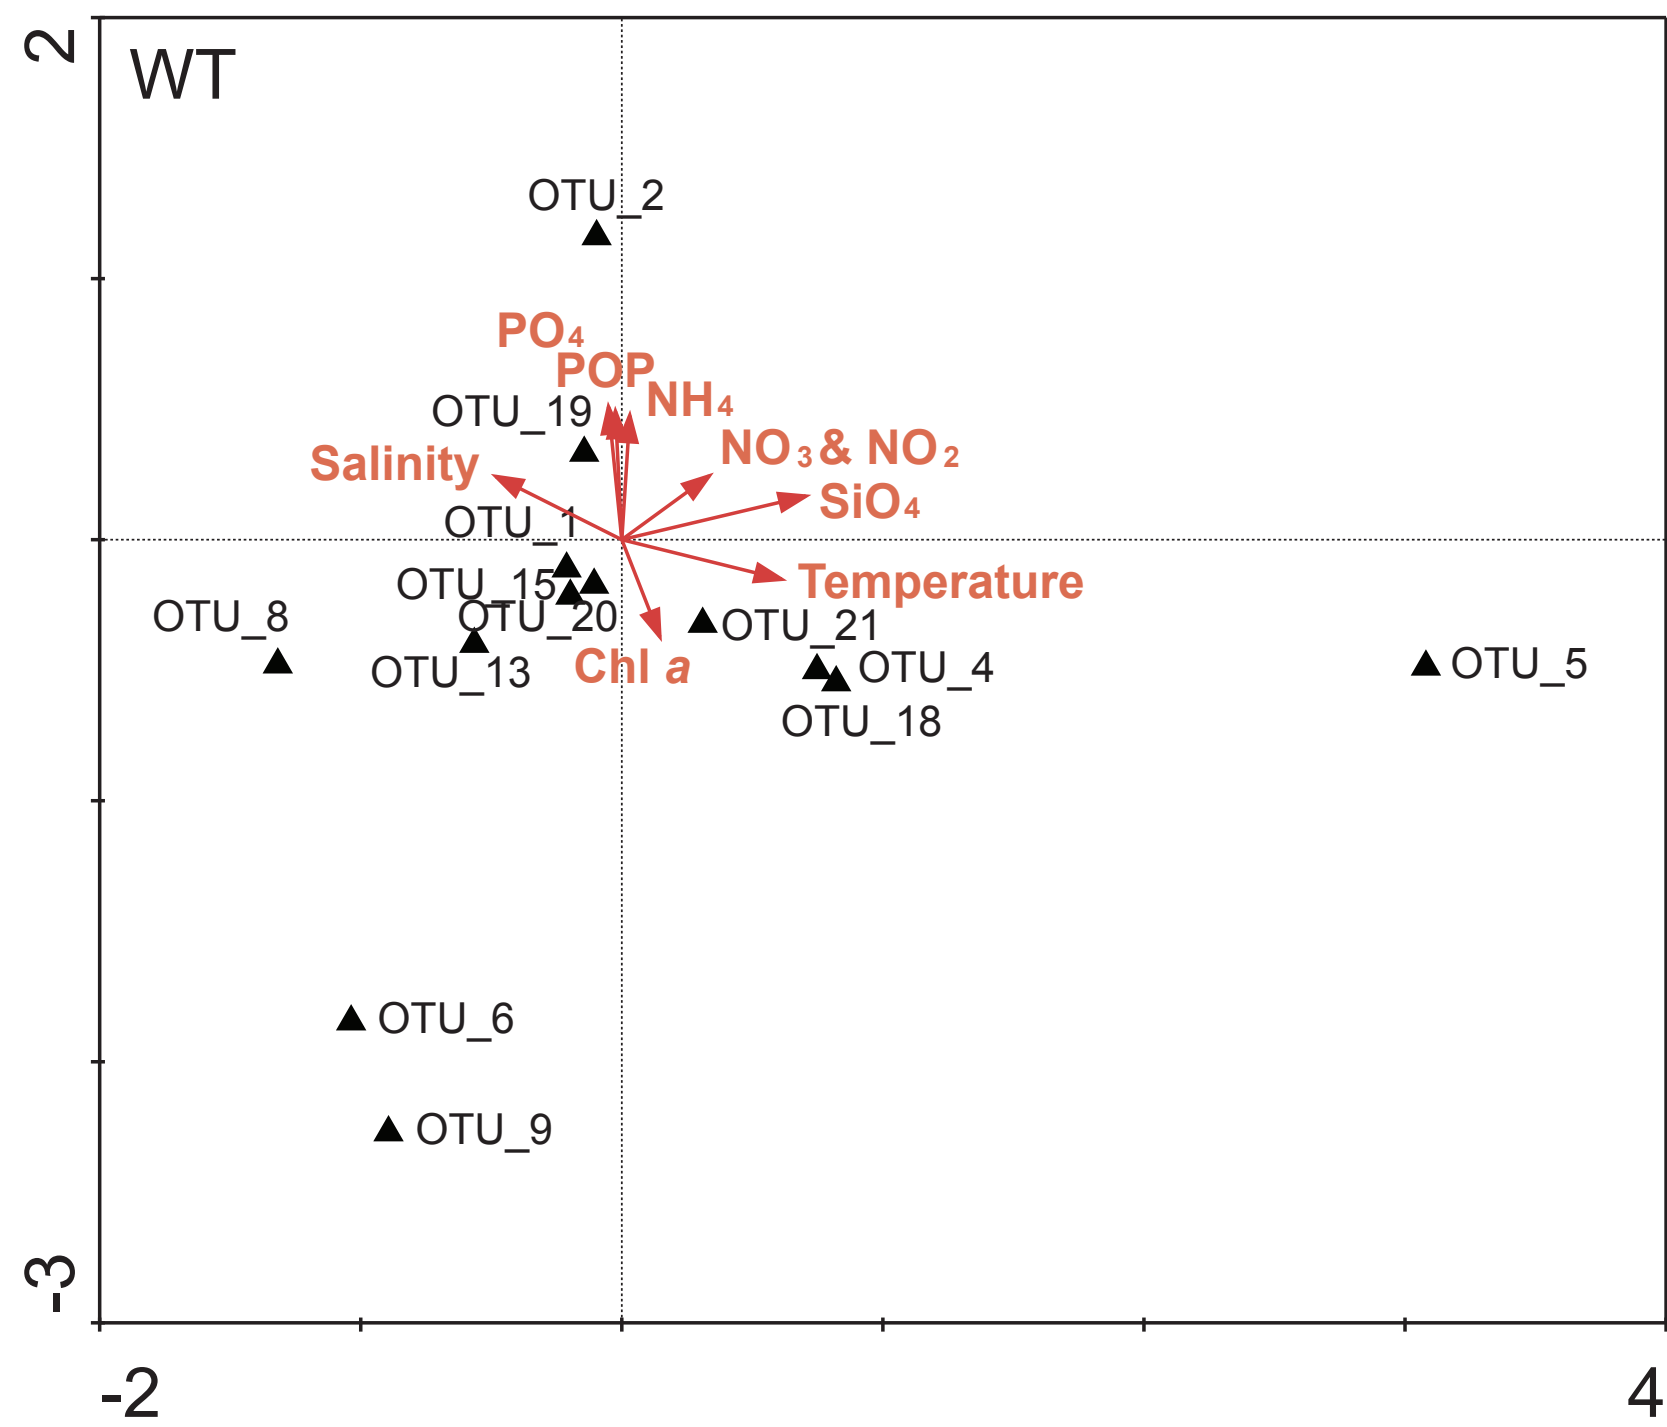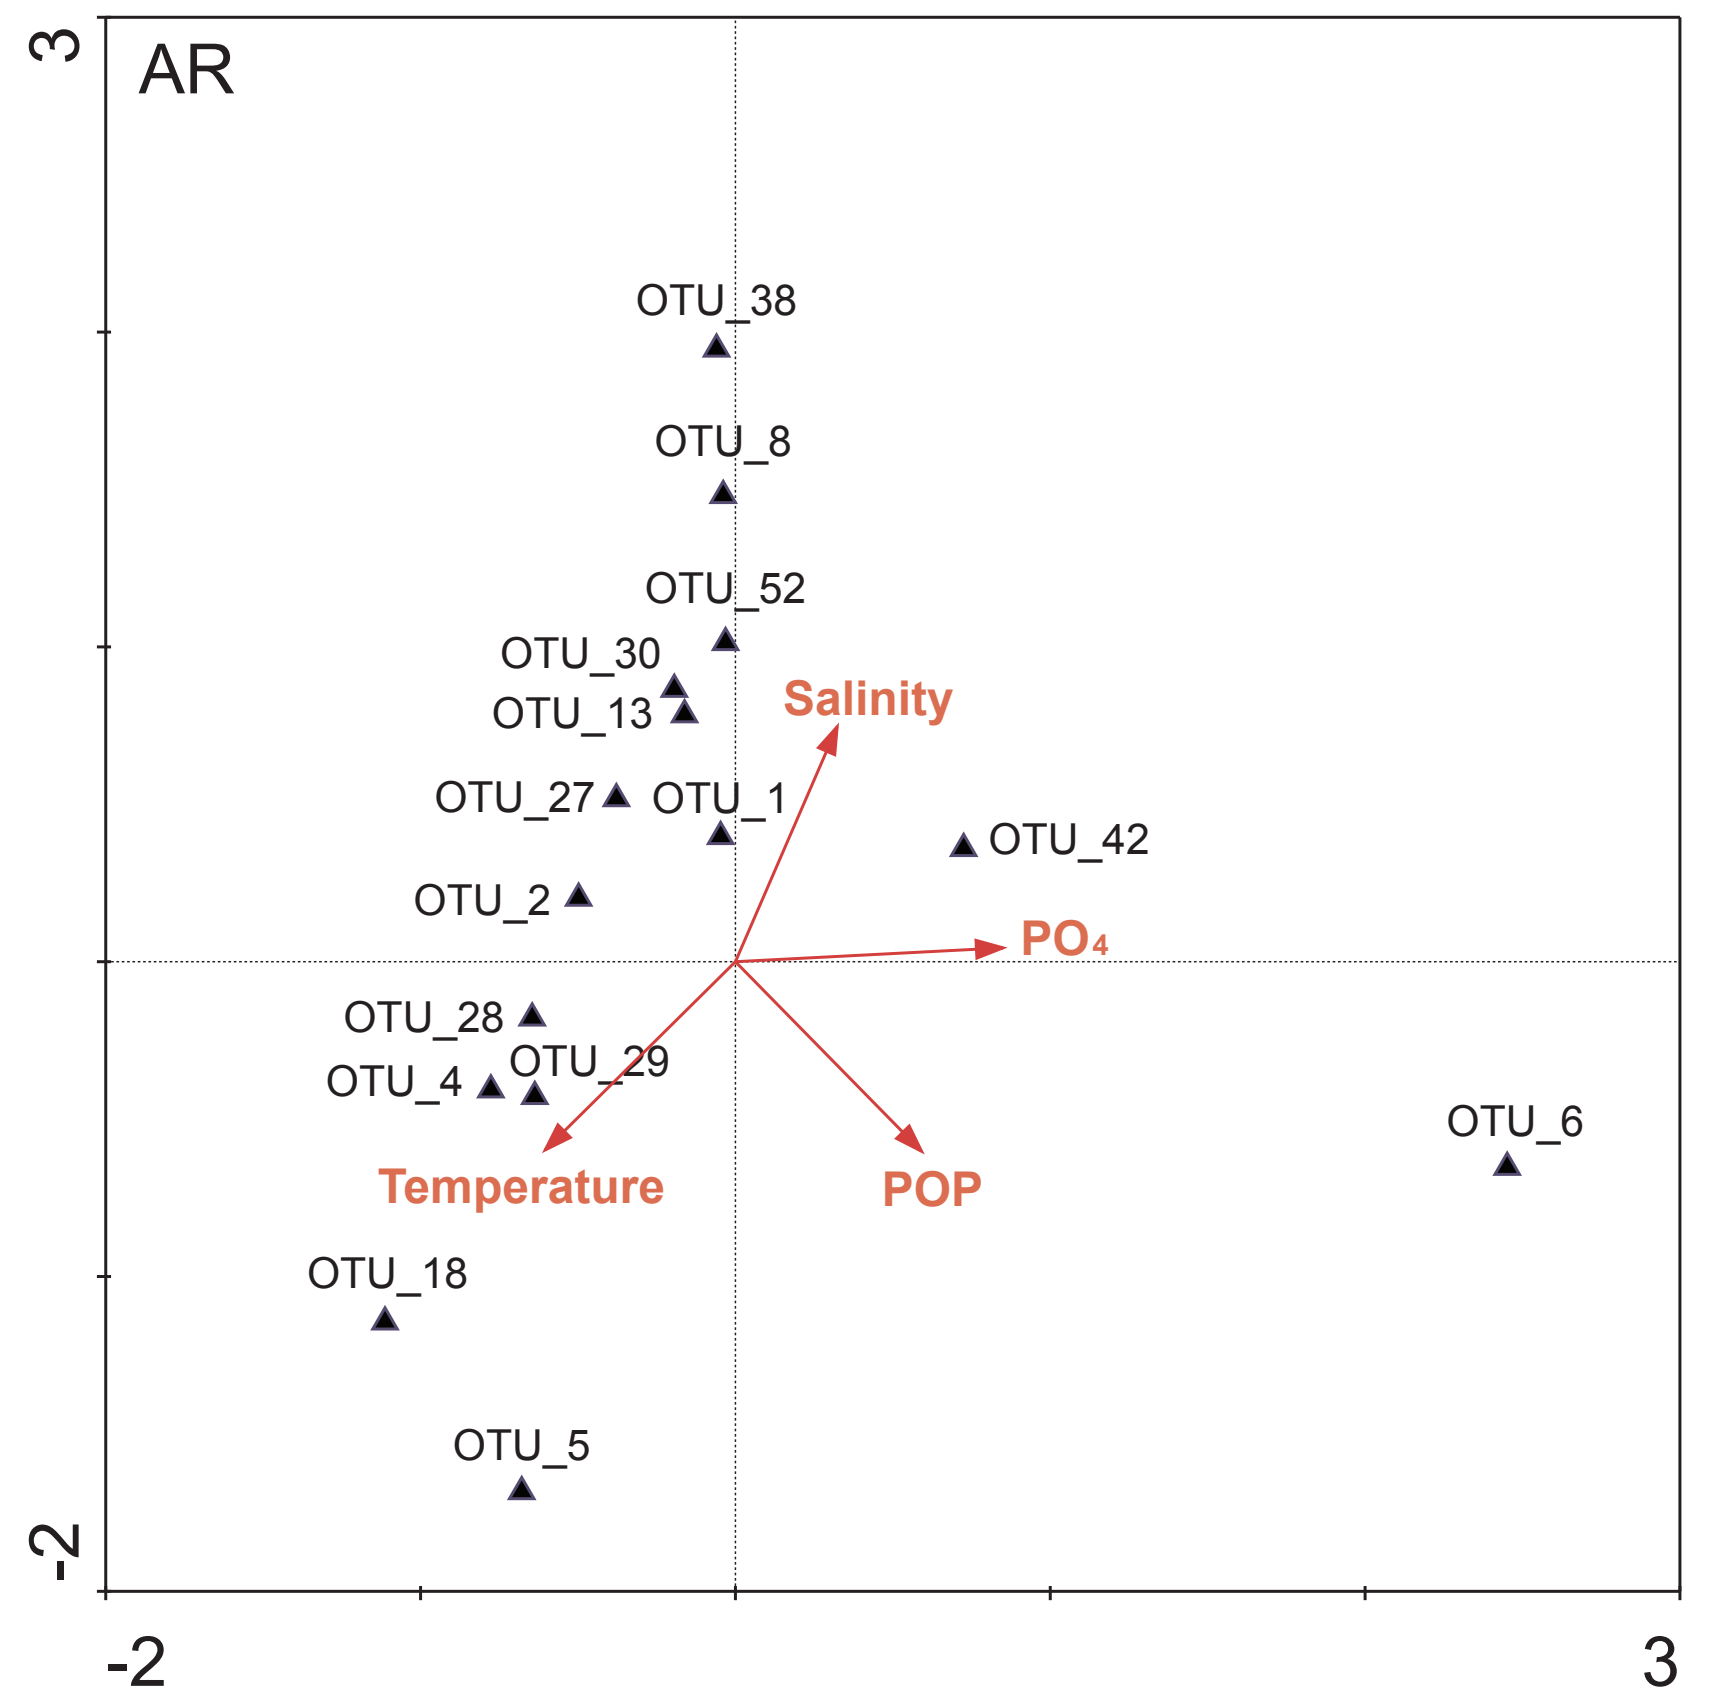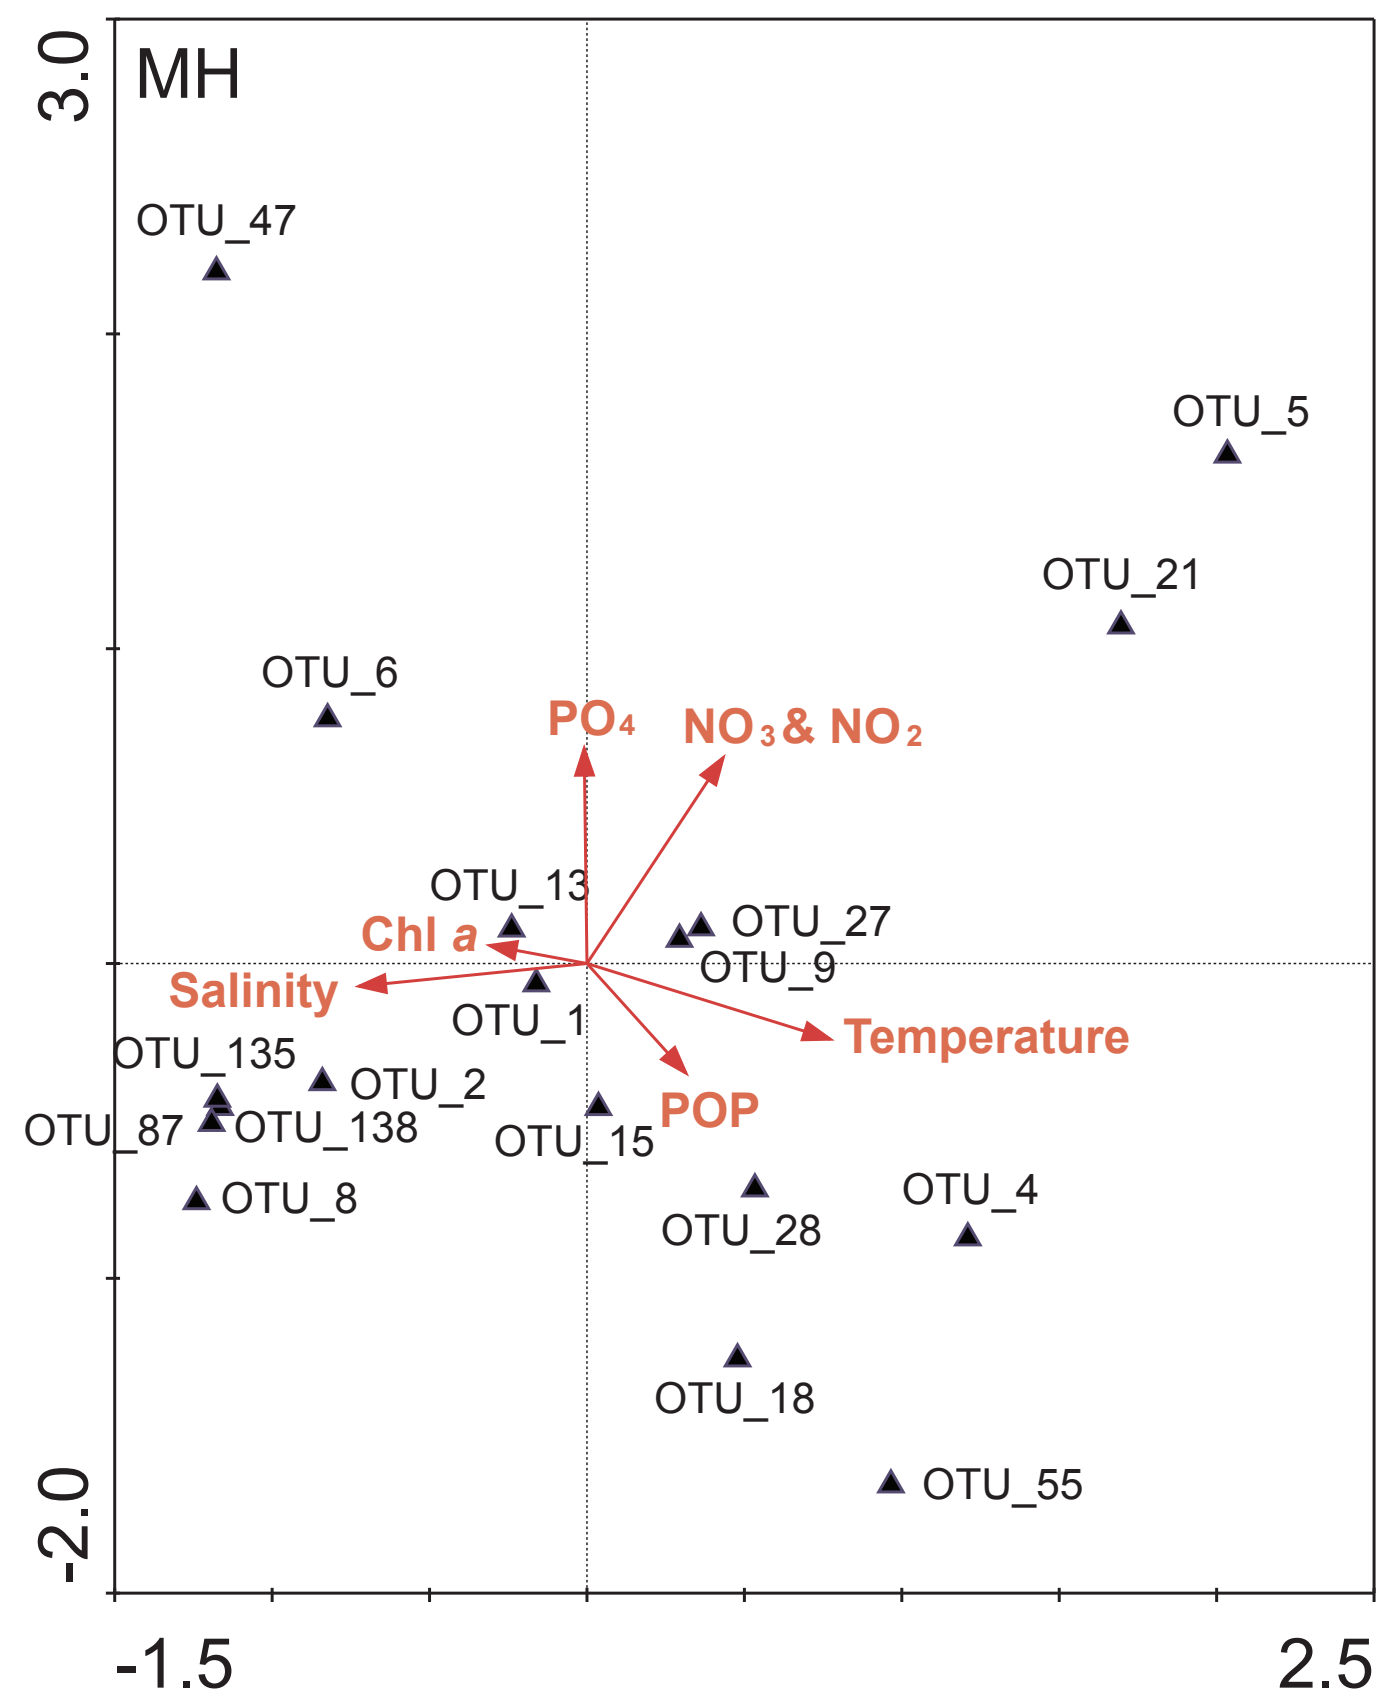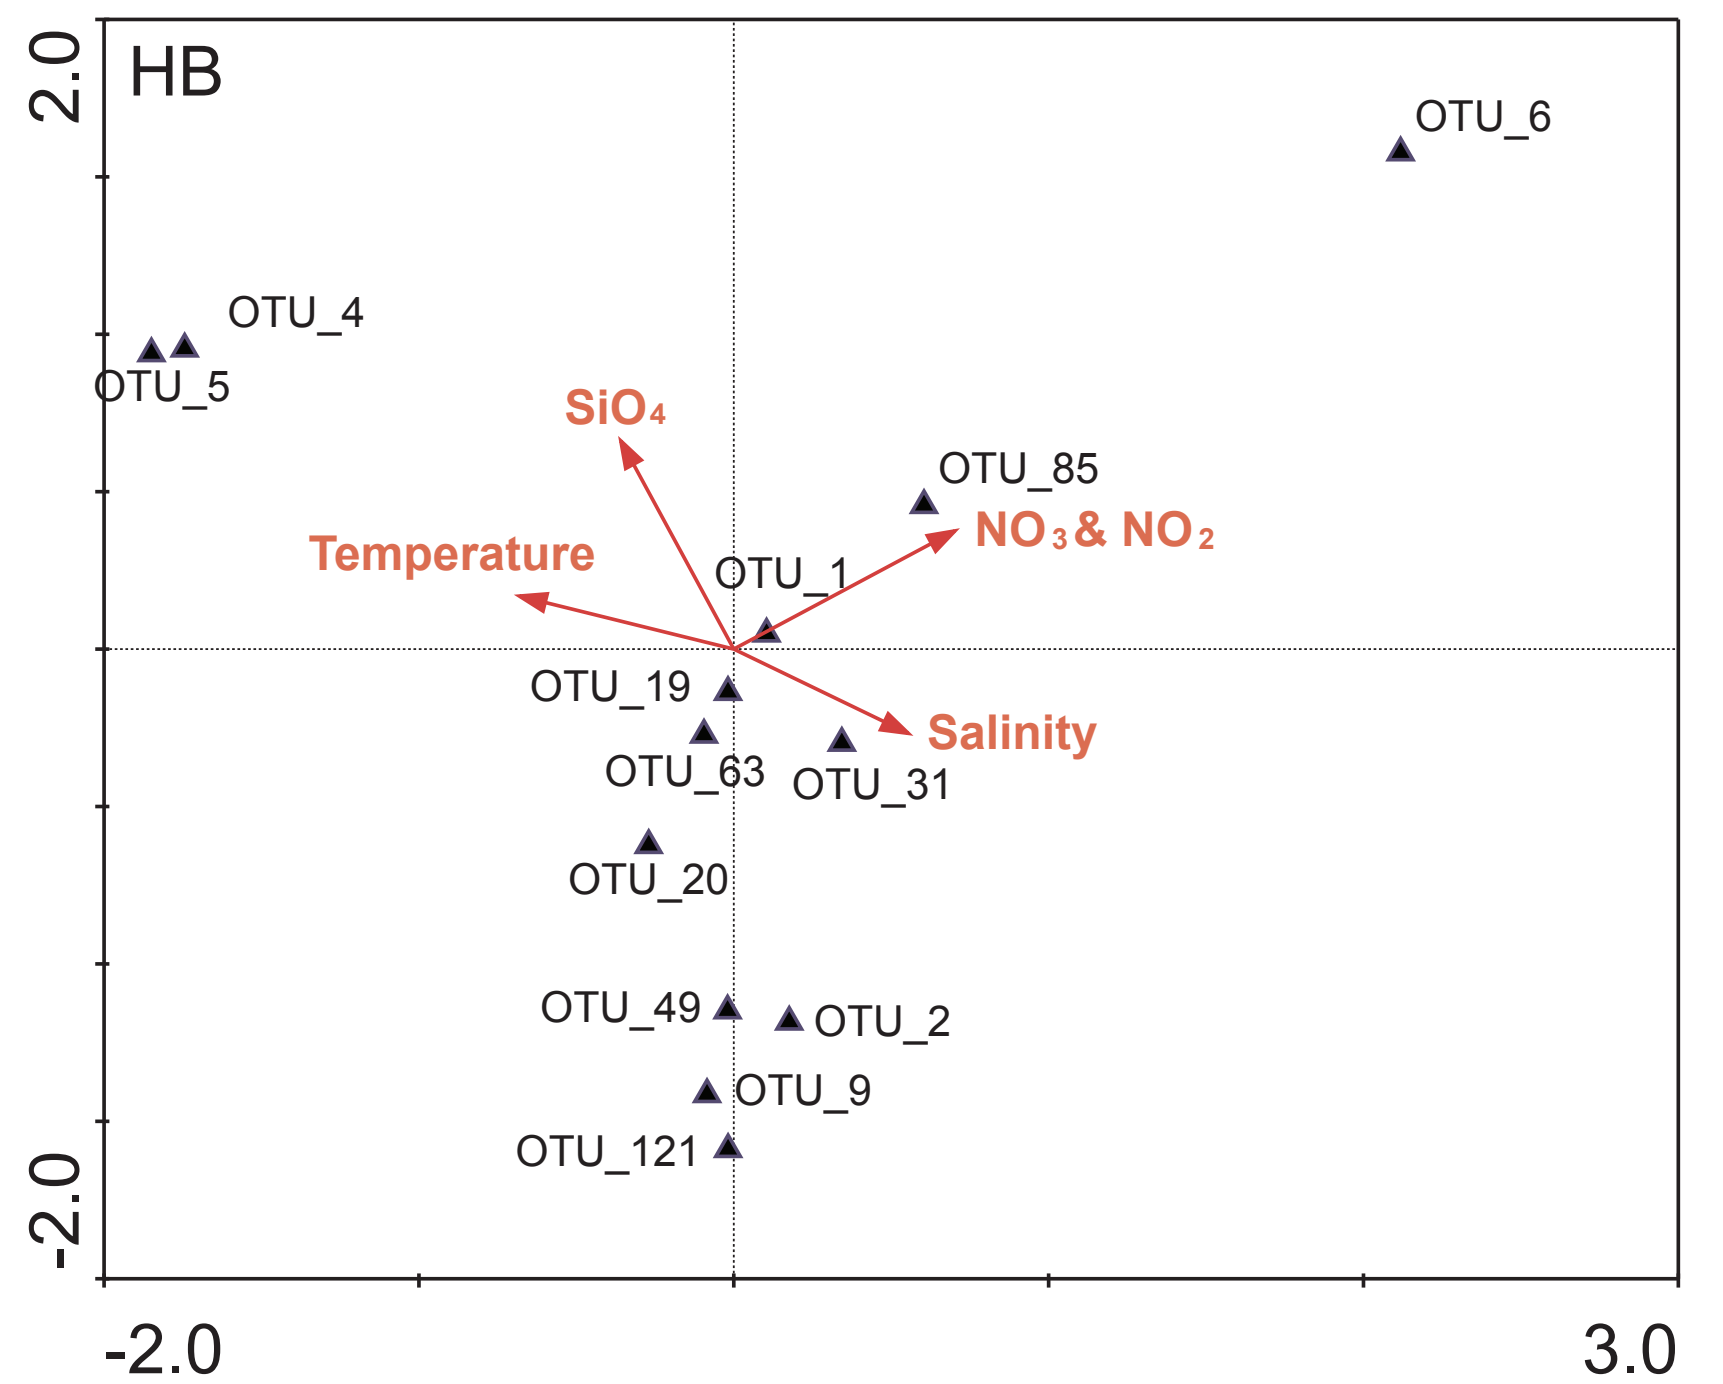

Supplement: s1 [file s1]
